# Supplementary material for: Globalization, Fertility, and Marital Behavior in a Lowest-Low Fertility Setting
Source: Oxford University Press journal article supplement (doi:10.1215/00703370-10275366), 2022-10-13
Supplement: giuntella_esm.pdf [file giuntella_esm.pdf]

# Globalization, Fertility and Marital Behavior in a Lowest-Low Fertility Setting

Osea Giuntella, University of Pittsburgh, IZA and NBER

Lorenzo Rotunno, Aix-Marseille University

Luca Stella, Freie Universitat Berlin, CESifo and IZA

Figure A.1: Average Yearly percent Change in Imports (Direct and Indirect) from Eastern Europe Normalized by the Wage Bill, by Industry

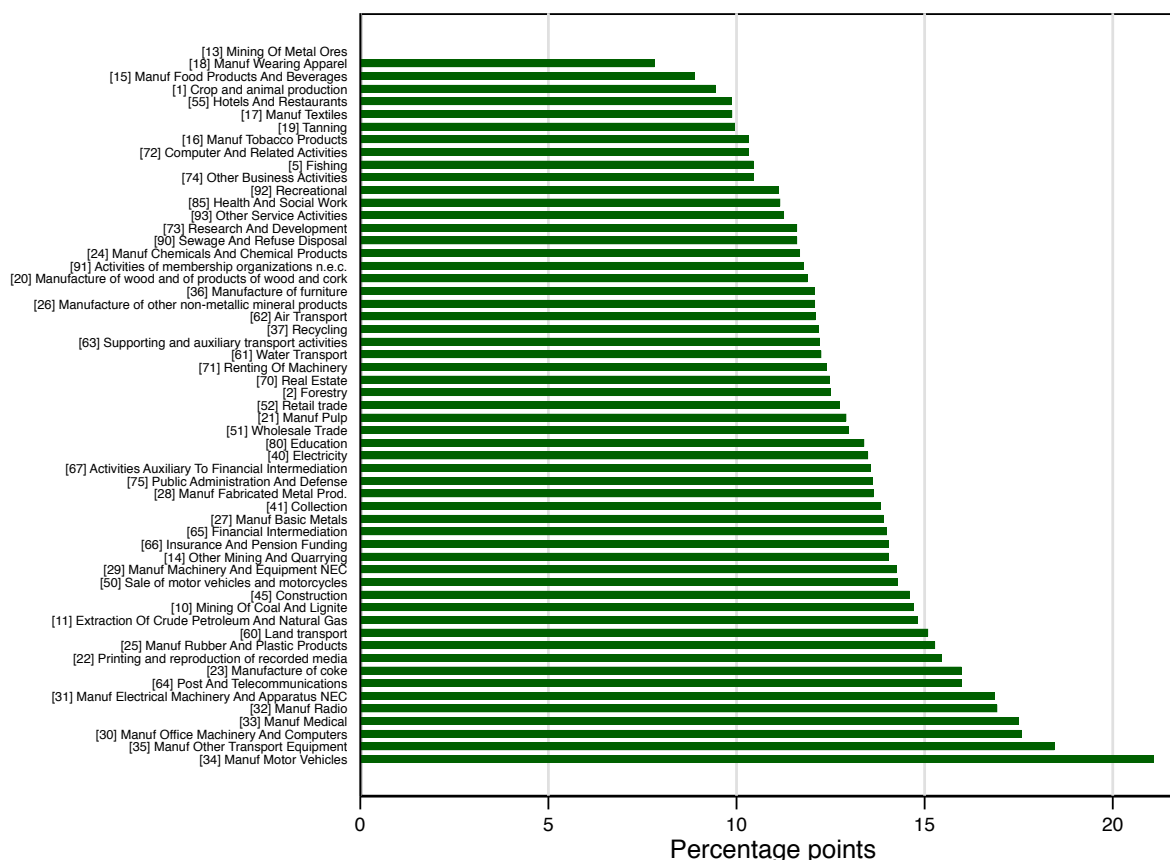

Notes - The trade variables equal the sum of the direct and indirect (through input-output linkages) components, and is divided by the industry's wage bill. It equals the *IM* variable in Equation (1) (see the main text for details).

Figure A.2: Average Yearly Percent Change in Exports (Direct and Indirect) from Eastern Europe Normalized by the Wage Bill, by Industry

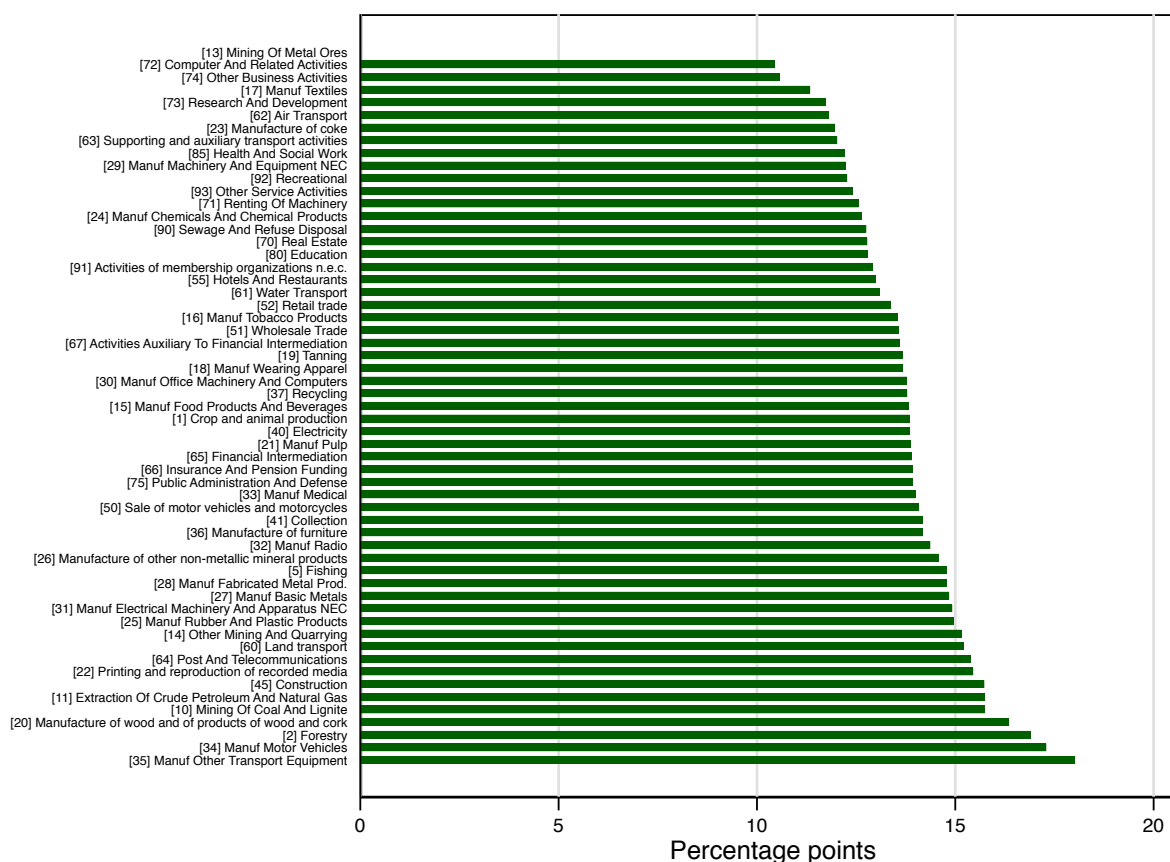

Notes - The trade variables equal the sum of the direct and indirect (through input-output linkages) components, and is divided by the industry's wage bill. It equals the *EX* variable in Equation (1) (see the main text for details).

Table A.1: Descriptive Statistics

|                                       | Mean   | Std. dev. |
|---------------------------------------|--------|-----------|
| Panel A: Outcome variables            |        |           |
| Fertility                             | 0.042  | 0.202     |
| Marital fertility                     | 0.051  | 0.221     |
| Nonmarital fertility                  | 0.022  | 0.147     |
| Married                               | 0.619  | 0.486     |
| Divorced                              | 0.057  | 0.233     |
| Cohabiting                            | 0.222  | 0.416     |
| Income                                | 23,029 | 14,705    |
| Hours worked                          | 38.106 | 12.894    |
| Employment                            | 0.739  | 0.439     |
| Labor force participation             | 0.813  | 0.390     |
| Panel B: Covariates                   |        |           |
| Age                                   | 34.199 | 6.567     |
| Female                                | 0.463  | 0.499     |
| College or more                       | 0.245  | 0.430     |
| Household size                        | 3.186  | 1.293     |
| Import exposure (Eastern Europe)      | 0.156  | 0.271     |
| Export exposure (Eastern Europe)      | 0.211  | 0.339     |
| Import exposure (Eastern Europe) - IV | 0.069  | 0.127     |
| Export exposure (Eastern Europe) - IV | 0.065  | 0.115     |
| Import exposure (China)               | 0.062  | 0.139     |
| Export exposure (China)               | 0.041  | 0.083     |
| Import exposure (China) - IV          | 0.320  | 0.983     |
| Export exposure (China) - IV          | 0.172  | 0.345     |

*Notes* - Data are drawn from the SOEP (v.35) for individuals aged 20-44 years (survey years: 1991-2018). All the samples contain individuals for whom information on all observables and the respective outcome variable are not missing.

Table A.2: Effects of Trade Exposure on Labor Force Participation, by Education and Gender - 2SLS Estimates

|                                     | (1)<br>Pooled      | (2)<br>Low-educated | (3)<br>High-educated | (4)<br>Males       | (5)<br>Females    |
|-------------------------------------|--------------------|---------------------|----------------------|--------------------|-------------------|
| Import exposure<br>(Eastern Europe) | -0.163*<br>(0.095) | -0.182*<br>(0.107)  | -0.105<br>(0.148)    | -0.174*<br>(0.095) | -0.038<br>(0.166) |
| Export exposure<br>(Eastern Europe) | 0.096<br>(0.075)   | 0.114<br>(0.083)    | 0.033<br>(0.105)     | 0.118<br>(0.081)   | 0.010<br>(0.111)  |
| Observations                        | 70,893             | 54,981              | 15,713               | 34,667             | 36,211            |
| Mean of dep. var.                   | 0.814              | 0.795               | 0.879                | 0.884              | 0.746             |
| Std. dev. of dep. var.              | 0.389              | 0.403               | 0.326                | 0.320              | 0.435             |
| First stage F-statistic Import      | 52.7               | 54.6                | 34                   | 99.2               | 17.2              |
| First stage F-statistic Export      | 70.5               | 60.8                | 34.6                 | 76.5               | 53.3              |

*Notes* - Standard errors are reported in parentheses and are clustered at the industry level. All models include individual, year  $\times$  federal state, year  $\times$  occupation, and 1-digit industry fixed effects. Further controls include age and its quadratic term, indicators for education, and household size.

\* Significant at 10%; \*\* significant at 5%; \*\*\* significant at 1%.

Table A.3: Effects of Trade Exposure on Labor Market Outcomes, by Education and Gender - 2SLS Estimates

|                                     | (1)<br>Pooled<br>Males | (2)<br>Females    | (3)<br>Low-educated<br>Males | (4)<br>Females    | (5)<br>High-educated<br>Males | (6)<br>Females    |
|-------------------------------------|------------------------|-------------------|------------------------------|-------------------|-------------------------------|-------------------|
| Panel A: Income                     |                        |                   |                              |                   |                               |                   |
| Import exposure<br>(Eastern Europe) | -0.446***<br>(0.113)   | 0.148<br>(0.354)  | -0.459***<br>(0.128)         | 0.346<br>(0.431)  | -0.040<br>(0.161)             | -0.460<br>(0.464) |
| Export exposure<br>(Eastern Europe) | 0.343***<br>(0.082)    | -0.044<br>(0.220) | 0.393***<br>(0.101)          | -0.172<br>(0.265) | -0.017<br>(0.130)             | 0.239<br>(0.305)  |
| Observations                        | 28,524                 | 23,631            | 21,481                       | 17,661            | 6,857                         | 5,831             |
| Mean of dep. var.                   | 27,777                 | 17,394            | 24,250                       | 15,821            | 38,848                        | 22,098            |
| Std. dev. of dep. var.              | 15,612                 | 11,128            | 11,928                       | 9,520             | 19,899                        | 13,846            |
| Panel B: Hours Worked               |                        |                   |                              |                   |                               |                   |
| Import exposure<br>(Eastern Europe) | -0.297***<br>(0.099)   | 0.058<br>(0.292)  | -0.271**<br>(0.120)          | 0.280<br>(0.349)  | -0.145<br>(0.186)             | -0.530<br>(0.469) |
| Export exposure<br>(Eastern Europe) | 0.232***<br>(0.072)    | -0.028<br>(0.172) | 0.233***<br>(0.087)          | -0.155<br>(0.207) | 0.075<br>(0.153)              | 0.219<br>(0.268)  |
| Observations                        | 29,165                 | 24,890            | 21,944                       | 18,636            | 7,044                         | 6,115             |
| Mean of dep. var.                   | 42.56                  | 32.92             | 41.78                        | 32.18             | 45.12                         | 35.23             |
| Std. dev. of dep. var.              | 10.66                  | 13.30             | 10.32                        | 13.23             | 11.07                         | 13.22             |
| Panel C: Employment                 |                        |                   |                              |                   |                               |                   |
| Import exposure<br>(Eastern Europe) | -0.226**<br>(0.108)    | -0.206<br>(0.208) | -0.296**<br>(0.143)          | -0.239<br>(0.193) | -0.089<br>(0.109)             | -0.289<br>(0.321) |
| Export exposure<br>(Eastern Europe) | 0.151*<br>(0.085)      | 0.093<br>(0.136)  | 0.215*<br>(0.109)            | 0.103<br>(0.129)  | 0.036<br>(0.081)              | 0.101<br>(0.207)  |
| Observations                        | 34,667                 | 36,211            | 26,930                       | 28,028            | 7,577                         | 8,058             |
| Mean of dep. var.                   | 0.834                  | 0.649             | 0.805                        | 0.618             | 0.940                         | 0.757             |
| Std. dev. of dep. var.              | 0.372                  | 0.477             | 0.396                        | 0.486             | 0.237                         | 0.429             |

Notes - Standard errors are reported in parentheses and are clustered at the industry level. All models include individual, year  $\times$  federal state, year  $\times$  occupation, and 1-digit industry fixed effects. Further controls include age and its quadratic term, indicators for education, and household size.

\* Significant at 10%; \*\* significant at 5%; \*\*\* significant at 1%.

Table A.4: Effects of Trade Exposure on Labor Force Participation, by Education and Gender - 2SLS Estimates

|                                     | (1)                | (2)               | (3)               | (4)               | (5)               | (6)               |
|-------------------------------------|--------------------|-------------------|-------------------|-------------------|-------------------|-------------------|
|                                     | Pooled             |                   | Low-educated      |                   | High-educated     |                   |
|                                     | Males              | Females           | Males             | Females           | Males             | Females           |
| Import exposure<br>(Eastern Europe) | -0.174*<br>(0.095) | -0.038<br>(0.166) | -0.184<br>(0.134) | -0.023<br>(0.166) | -0.125<br>(0.100) | -0.479<br>(0.330) |
| Export exposure<br>(Eastern Europe) | 0.118<br>(0.081)   | 0.010<br>(0.111)  | 0.139<br>(0.108)  | -0.004<br>(0.109) | 0.075<br>(0.072)  | 0.238<br>(0.219)  |
| Observations                        | 34,667             | 36,211            | 26,930            | 28,028            | 7,577             | 8,058             |
| Mean of dep. var.                   | 0.884              | 0.746             | 0.864             | 0.729             | 0.954             | 0.809             |
| Std. dev. of dep. var.              | 0.320              | 0.435             | 0.342             | 0.445             | 0.210             | 0.393             |

*Notes* - Standard errors are reported in parentheses and are clustered at the industry level. All models include individual, year  $\times$  federal state, year  $\times$  occupation, and 1-digit industry fixed effects. Further controls include age and its quadratic term, indicators for education, and household size.

\* Significant at 10%; \*\* significant at 5%; \*\*\* significant at 1%.

Table A.5: Effects of Trade Exposure on Labor Market Outcomes - OLS Estimates

|                                     | (1)<br>Pooled      | (2)<br>Low-educated | (3)<br>High-educated | (4)<br>Males        | (5)<br>Females      |
|-------------------------------------|--------------------|---------------------|----------------------|---------------------|---------------------|
| Panel A: Income                     |                    |                     |                      |                     |                     |
| Import exposure<br>(Eastern Europe) | -0.086*<br>(0.051) | -0.065<br>(0.075)   | -0.146<br>(0.113)    | -0.052<br>(0.064)   | -0.254**<br>(0.113) |
| Export exposure<br>(Eastern Europe) | 0.105**<br>(0.042) | 0.100*<br>(0.055)   | 0.118*<br>(0.062)    | 0.065<br>(0.062)    | 0.229***<br>(0.072) |
| Observations                        | 52,180             | 39,185              | 12,784               | 28,525              | 23,634              |
| Mean of dep. var.                   | 23,075             | 20,456              | 31,190               | 27,778              | 17,398              |
| Std. dev. of dep. var.              | 14,701             | 11,694              | 19,288               | 15,610              | 11,129              |
| Panel B: Hours Worked               |                    |                     |                      |                     |                     |
| Import exposure<br>(Eastern Europe) | -0.030<br>(0.042)  | -0.007<br>(0.057)   | -0.134**<br>(0.065)  | -0.025<br>(0.038)   | -0.100<br>(0.085)   |
| Export exposure<br>(Eastern Europe) | 0.022<br>(0.036)   | 0.020<br>(0.044)    | 0.090*<br>(0.052)    | 0.027<br>(0.031)    | 0.071<br>(0.056)    |
| Observations                        | 54,080             | 40,622              | 13,255               | 29,166              | 24,894              |
| Mean of dep. var.                   | 38.13              | 37.37               | 40.50                | 42.56               | 32.93               |
| Std. dev. of dep. var.              | 12.88              | 12.69               | 13.08                | 10.66               | 13.30               |
| Panel C: Employment                 |                    |                     |                      |                     |                     |
| Import exposure<br>(Eastern Europe) | -0.068<br>(0.043)  | -0.064<br>(0.055)   | -0.001<br>(0.066)    | -0.084**<br>(0.040) | -0.062<br>(0.072)   |
| Export exposure<br>(Eastern Europe) | 0.015<br>(0.033)   | 0.007<br>(0.041)    | -0.045<br>(0.056)    | 0.040<br>(0.036)    | 0.001<br>(0.049)    |
| Observations                        | 70,893             | 54,981              | 15,713               | 34,667              | 36,211              |
| Mean of dep. var.                   | 0.740              | 0.710               | 0.846                | 0.834               | 0.649               |
| Std. dev. of dep. var.              | 0.439              | 0.454               | 0.361                | 0.372               | 0.477               |

*Notes* - Standard errors are reported in parentheses and are clustered at the industry level. All models include individual, year  $\times$  federal state, year  $\times$  occupation, and 1-digit industry fixed effects. Further controls include age and its quadratic term, indicators for education, and household size.

\* Significant at 10%; \*\* significant at 5%; \*\*\* significant at 1%.

Table A.6: Effects of Trade Exposure on Labor Force Participation - OLS Estimates

|                                     | (1)<br>Pooled     | (2)<br>Low-educated | (3)<br>High-educated | (4)<br>Males        | (5)<br>Females    |
|-------------------------------------|-------------------|---------------------|----------------------|---------------------|-------------------|
| Import exposure<br>(Eastern Europe) | -0.040<br>(0.039) | -0.026<br>(0.046)   | -0.023<br>(0.064)    | -0.075**<br>(0.033) | 0.013<br>(0.063)  |
| Export exposure<br>(Eastern Europe) | 0.004<br>(0.031)  | -0.002<br>(0.033)   | -0.037<br>(0.053)    | 0.037<br>(0.032)    | -0.031<br>(0.044) |
| Observations                        | 70,893            | 54,981              | 15,713               | 34,667              | 36,211            |
| Mean of dep. var.                   | 0.814             | 0.795               | 0.879                | 0.884               | 0.746             |
| Std. dev. of dep. var.              | 0.389             | 0.403               | 0.326                | 0.320               | 0.435             |

Notes - Standard errors are reported in parentheses and are clustered at the industry level. All models include individual, year  $\times$  federal state, year  $\times$  occupation, and 1-digit industry fixed effects. Further controls include age and its quadratic term, indicators for education, and household size.

\* Significant at 10%; \*\* significant at 5%; \*\*\* significant at 1%.

Table A.7: Effects of Trade Exposure on Part-time, by Education and Gender - 2SLS Estimates

|                                     | (1)<br>Pooled       | (2)<br>Low-educated  | (3)<br>High-educated | (4)<br>Males      | (5)<br>Females      |
|-------------------------------------|---------------------|----------------------|----------------------|-------------------|---------------------|
| Import exposure<br>(Eastern Europe) | -0.127**<br>(0.050) | -0.176***<br>(0.059) | 0.079<br>(0.116)     | -0.039<br>(0.026) | -0.367**<br>(0.173) |
| Export exposure<br>(Eastern Europe) | 0.035<br>(0.040)    | 0.072<br>(0.044)     | -0.124<br>(0.082)    | 0.020<br>(0.020)  | 0.130<br>(0.124)    |
| Observations                        | 55,060              | 41,454               | 13,393               | 29,577            | 25,463              |
| Mean of dep. var.                   | 0.155               | 0.152                | 0.167                | 0.019             | 0.314               |
| Std. dev. of dep. var.              | 0.362               | 0.359                | 0.373                | 0.137             | 0.464               |
| First stage F-statistic Import      | 96.7                | 97.8                 | 29.6                 | 113.1             | 32.1                |
| First stage F-statistic Export      | 79.8                | 68.9                 | 33.5                 | 78.6              | 61                  |

Notes - Standard errors are reported in parentheses and are clustered at the industry level. All models include individual, year  $\times$  federal state, year  $\times$  occupation, and 1-digit industry fixed effects. Further controls include age and its quadratic term, indicators for education, and household size.

\* Significant at 10%; \*\* significant at 5%; \*\*\* significant at 1%.



Table A.8: Effects of Trade Exposure on Labor Market Outcomes, Fertility and Marital Behavior  
- Full-time Workers - 2SLS Estimates

|                                     | (1)<br>Income       | (2)<br>Hours worked | (3)<br>Overall fertility | (4)<br>Marital fertility | (5)<br>Nonmarital fertility |
|-------------------------------------|---------------------|---------------------|--------------------------|--------------------------|-----------------------------|
| Import exposure<br>(Eastern Europe) | -0.137**<br>(0.060) | -0.124*<br>(0.063)  | -0.107*<br>(0.054)       | -0.115<br>(0.069)        | -0.035<br>(0.077)           |
| Export exposure<br>(Eastern Europe) | 0.146***<br>(0.044) | 0.105**<br>(0.043)  | 0.049<br>(0.039)         | 0.077<br>(0.050)         | 0.001<br>(0.056)            |
| Observations                        | 37,351              | 38,256              | 35,575                   | 24,265                   | 10,866                      |
| Mean of dep. var.                   | 27,598              | 43.30               | 0.047                    | 0.057                    | 0.022                       |
| Std. dev. of dep. var.              | 14,010              | 8.609               | 0.212                    | 0.232                    | 0.147                       |
| First stage F-statistic Import      | 83.6                | 88.1                | 85.4                     | 95.9                     | 21.4                        |
| First stage F-statistic Export      | 61.2                | 62.2                | 62.4                     | 67.5                     | 31.2                        |

*Notes* - Standard errors are reported in parentheses and are clustered at the industry level. All models include individual, year  $\times$  federal state, year  $\times$  occupation, and 1-digit industry fixed effects. Further controls include age and its quadratic term, indicators for education, and household size.

\* Significant at 10%; \*\* significant at 5%; \*\*\* significant at 1%.

Table A.9: Effects of Trade Exposure on Labor Market Outcomes - Exposure to China - 2SLS Estimates

|                                | (1)<br>Pooled     | (2)<br>Low-educated | (3)<br>High-educated | (4)<br>Males      | (5)<br>Females    |
|--------------------------------|-------------------|---------------------|----------------------|-------------------|-------------------|
| Panel A: Income                |                   |                     |                      |                   |                   |
| Import exposure (China)        | -0.093<br>(0.111) | -0.135<br>(0.143)   | -0.018<br>(0.358)    | -0.152<br>(0.106) | 0.168<br>(0.230)  |
| Export exposure (China)        | 0.240<br>(0.164)  | 0.274<br>(0.175)    | 0.152<br>(0.459)     | 0.244<br>(0.214)  | 0.031<br>(0.317)  |
| Observations                   | 52,113            | 39,140              | 12,763               | 28,462            | 23,630            |
| Mean of dep. var.              | 23,050            | 20,439              | 31,144               | 27,749            | 17,388            |
| Std. dev. of dep. var.         | 14,680            | 11,675              | 19,273               | 15,596            | 11,107            |
| First stage F-statistic Import | 79.5              | 98.8                | 19.7                 | 78.7              | 122.2             |
| First stage F-statistic Export | 454.2             | 490.9               | 174.9                | 214.4             | 649.2             |
| Panel B: Hours Worked          |                   |                     |                      |                   |                   |
| Import exposure (China)        | -0.095<br>(0.102) | -0.024<br>(0.134)   | -0.438<br>(0.305)    | 0.033<br>(0.071)  | -0.007<br>(0.188) |
| Export exposure (China)        | 0.123<br>(0.147)  | 0.021<br>(0.167)    | 0.719*<br>(0.421)    | -0.026<br>(0.104) | 0.024<br>(0.213)  |
| Observations                   | 54,013            | 40,576              | 13,235               | 29,103            | 24,890            |
| Mean of dep. var.              | 38.12             | 37.37               | 40.50                | 42.56             | 32.94             |
| Std. dev. of dep. var.         | 12.87             | 12.68               | 13.10                | 10.66             | 13.30             |
| First stage F-statistic Import | 82.8              | 98                  | 23.2                 | 80.6              | 140.2             |
| First stage F-statistic Export | 431.4             | 461.3               | 196.5                | 211.7             | 718.6             |
| Panel C: Employment            |                   |                     |                      |                   |                   |
| Import exposure (China)        | -0.111<br>(0.077) | -0.149*<br>(0.079)  | 0.083<br>(0.161)     | -0.096<br>(0.092) | -0.104<br>(0.109) |
| Export exposure (China)        | 0.018<br>(0.133)  | 0.040<br>(0.165)    | -0.338<br>(0.225)    | 0.033<br>(0.155)  | -0.021<br>(0.187) |
| Observations                   | 70,823            | 54,927              | 15,699               | 34,601            | 36,207            |
| Mean of dep. var.              | 0.740             | 0.710               | 0.845                | 0.834             | 0.649             |
| Std. dev. of dep. var.         | 0.439             | 0.454               | 0.362                | 0.372             | 0.477             |
| First stage F-statistic Import | 52.6              | 58.9                | 23.1                 | 66                | 77.2              |
| First stage F-statistic Export | 210.5             | 227.1               | 158.8                | 171.9             | 191.7             |

Notes - Standard errors are reported in parentheses and are clustered at the industry level. All models include individual, year  $\times$  federal state, year  $\times$  occupation, and 1-digit industry fixed effects. Further controls include age and its quadratic term, indicators for education, and household size.

\* Significant at 10%; \*\* significant at 5%; \*\*\* significant at 1%.

Table A.10: Effects of Trade Exposure on Labor Force Participation - Exposure to China - 2SLS Estimates

|                                | (1)<br>Pooled     | (2)<br>Low-educated | (3)<br>High-educated | (4)<br>Males      | (5)<br>Females    |
|--------------------------------|-------------------|---------------------|----------------------|-------------------|-------------------|
| Import exposure<br>(China)     | -0.041<br>(0.057) | 0.003<br>(0.051)    | -0.106<br>(0.166)    | -0.068<br>(0.087) | -0.043<br>(0.088) |
| Export exposure<br>(China)     | -0.073<br>(0.104) | -0.144<br>(0.113)   | -0.101<br>(0.244)    | 0.037<br>(0.133)  | -0.133<br>(0.147) |
| Observations                   | 70,823            | 54,927              | 15,699               | 34,601            | 36,207            |
| Mean of dep. var.              | 0.814             | 0.795               | 0.879                | 0.884             | 0.746             |
| Std. dev. of dep. var.         | 0.389             | 0.404               | 0.326                | 0.321             | 0.435             |
| First stage F-statistic Import | 52.6              | 58.9                | 23.1                 | 66                | 77.2              |
| First stage F-statistic Export | 210.5             | 227.1               | 158.8                | 171.9             | 191.7             |

*Notes* - Standard errors are reported in parentheses and are clustered at the industry level. All models include individual, year  $\times$  federal state, year  $\times$  occupation, and 1-digit industry fixed effects. Further controls include age and its quadratic term, indicators for education, and household size.

\* Significant at 10%; \*\* significant at 5%; \*\*\* significant at 1%.

Table A.11: Effects of Trade Exposure on Fertility, by Education and Gender - OLS Estimates

|                                     | (1)               | (2)                | (3)               | (4)               | (5)               |
|-------------------------------------|-------------------|--------------------|-------------------|-------------------|-------------------|
|                                     | Pooled            | Low-educated       | High-educated     | Males             | Females           |
| Panel A: Overall Fertility          |                   |                    |                   |                   |                   |
| Import exposure<br>(Eastern Europe) | -0.022<br>(0.021) | -0.030<br>(0.024)  | 0.010<br>(0.058)  | -0.025<br>(0.030) | -0.002<br>(0.024) |
| Export exposure<br>(Eastern Europe) | -0.000<br>(0.015) | 0.007<br>(0.016)   | -0.028<br>(0.042) | -0.006<br>(0.022) | -0.004<br>(0.020) |
| Observations                        | 51,664            | 38,609             | 12,868            | 26,181            | 25,463            |
| Mean of dep. var.                   | 0.042             | 0.040              | 0.049             | 0.053             | 0.030             |
| Std. dev. of dep. var.              | 0.202             | 0.197              | 0.216             | 0.225             | 0.173             |
| Panel B: Marital Fertility          |                   |                    |                   |                   |                   |
| Import exposure<br>(Eastern Europe) | -0.031<br>(0.029) | -0.047<br>(0.028)  | 0.054<br>(0.079)  | -0.056<br>(0.037) | 0.017<br>(0.031)  |
| Export exposure<br>(Eastern Europe) | 0.025<br>(0.020)  | 0.041**<br>(0.019) | -0.057<br>(0.058) | 0.045<br>(0.030)  | -0.015<br>(0.026) |
| Observations                        | 35,597            | 25,982             | 9,521             | 17,789            | 17,766            |
| Mean of dep. var.                   | 0.051             | 0.049              | 0.056             | 0.068             | 0.033             |
| Std. dev. of dep. var.              | 0.220             | 0.216              | 0.231             | 0.252             | 0.181             |
| Panel C: Nonmarital Fertility       |                   |                    |                   |                   |                   |
| Import exposure<br>(Eastern Europe) | -0.004<br>(0.024) | -0.018<br>(0.027)  | 0.062<br>(0.091)  | 0.029<br>(0.042)  | -0.009<br>(0.063) |
| Export exposure<br>(Eastern Europe) | 0.000<br>(0.019)  | -0.001<br>(0.020)  | 0.007<br>(0.071)  | -0.025<br>(0.032) | -0.006<br>(0.042) |
| Observations                        | 15,634            | 12,267             | 3,150             | 8,157             | 7,410             |
| Mean of dep. var.                   | 0.022             | 0.021              | 0.024             | 0.022             | 0.022             |
| Std. dev. of dep. var.              | 0.145             | 0.142              | 0.155             | 0.145             | 0.146             |

*Notes* - Standard errors are reported in parentheses and are clustered at the industry level. All models include individual, year  $\times$  federal state, year  $\times$  occupation, and 1-digit industry fixed effects. Further controls include age and its quadratic term, indicators for education, and household size.

\* Significant at 10%; \*\* significant at 5%; \*\*\* significant at 1%.

Table A.12: Effects of Trade Exposure on Fertility, by Education and Gender - 2SLS Estimates

|                                     | (1)                 | (2)               | (3)                 | (4)               | (5)               | (6)               |
|-------------------------------------|---------------------|-------------------|---------------------|-------------------|-------------------|-------------------|
|                                     | Pooled              |                   | Low-educated        |                   | High-educated     |                   |
|                                     | Males               | Females           | Males               | Females           | Males             | Females           |
| Panel A: Overall Fertility          |                     |                   |                     |                   |                   |                   |
| Import exposure<br>(Eastern Europe) | -0.125**<br>(0.051) | -0.078<br>(0.081) | -0.121**<br>(0.060) | -0.103<br>(0.083) | -0.153<br>(0.191) | -0.185<br>(0.208) |
| Export exposure<br>(Eastern Europe) | 0.057<br>(0.038)    | 0.043<br>(0.055)  | 0.064<br>(0.048)    | 0.054<br>(0.058)  | 0.038<br>(0.127)  | 0.138<br>(0.128)  |
| Observations                        | 26,181              | 25,463            | 19,466              | 19,112            | 6,570             | 6,200             |
| Mean of dep. var.                   | 0.053               | 0.030             | 0.049               | 0.030             | 0.065             | 0.032             |
| Std. dev. of dep. var.              | 0.225               | 0.173             | 0.218               | 0.172             | 0.247             | 0.177             |
| Panel B: Marital Fertility          |                     |                   |                     |                   |                   |                   |
| Import exposure<br>(Eastern Europe) | -0.151**<br>(0.072) | -0.065<br>(0.085) | -0.129*<br>(0.068)  | -0.094<br>(0.090) | -0.275<br>(0.234) | -0.116<br>(0.237) |
| Export exposure<br>(Eastern Europe) | 0.096*<br>(0.055)   | 0.038<br>(0.058)  | 0.085<br>(0.059)    | 0.055<br>(0.062)  | 0.166<br>(0.158)  | 0.067<br>(0.146)  |
| Observations                        | 17,789              | 17,766            | 12,789              | 13,126            | 4,876             | 4,529             |
| Mean of dep. var.                   | 0.068               | 0.033             | 0.064               | 0.034             | 0.078             | 0.033             |
| Std. dev. of dep. var.              | 0.252               | 0.181             | 0.246               | 0.182             | 0.269             | 0.180             |
| Panel C: Nonmarital Fertility       |                     |                   |                     |                   |                   |                   |
| Import exposure<br>(Eastern Europe) | -0.013<br>(0.088)   | 0.069<br>(0.143)  | -0.015<br>(0.093)   | -0.032<br>(0.125) | 0.022<br>(0.224)  | 0.439<br>(1.083)  |
| Export exposure<br>(Eastern Europe) | -0.014<br>(0.061)   | -0.057<br>(0.096) | -0.020<br>(0.067)   | -0.006<br>(0.097) | -0.010<br>(0.132) | -0.171<br>(0.585) |
| Observations                        | 8,157               | 7,410             | 6,467               | 5,711             | 1,526             | 1,504             |
| Mean of dep. var.                   | 0.022               | 0.022             | 0.021               | 0.020             | 0.025             | 0.027             |
| Std. dev. of dep. var.              | 0.145               | 0.146             | 0.143               | 0.141             | 0.156             | 0.161             |

Notes - Standard errors are reported in parentheses and are clustered at the industry level. All models include individual, year  $\times$  federal state, year  $\times$  occupation, and 1-digit industry fixed effects. Further controls include age and its quadratic term, indicators for education, and household size.

\* Significant at 10%; \*\* significant at 5%; \*\*\* significant at 1%.

Table A.13: Effects of Trade Exposure on First Child vs. Higher-order Children, by Gender - 2SLS Estimates

| Dep. var.: Overall fertility        | (1)<br>Pooled       | (2)<br>First child | (3)<br>Second or more |
|-------------------------------------|---------------------|--------------------|-----------------------|
| Panel A: Males                      |                     |                    |                       |
| Import exposure<br>(Eastern Europe) | -0.125**<br>(0.051) | -0.129*<br>(0.066) | 0.108<br>(0.091)      |
| Export exposure<br>(Eastern Europe) | 0.057<br>(0.038)    | 0.064<br>(0.046)   | -0.124*<br>(0.063)    |
| Observations                        | 26,181              | 16,359             | 9,657                 |
| Mean of dep. var.                   | 0.054               | 0.037              | 0.081                 |
| Std. dev. of dep. var.              | 0.225               | 0.188              | 0.273                 |
| First stage F-statistic Import      | 116                 | 95.6               | 84                    |
| First stage F-statistic Export      | 82.7                | 90.1               | 62.8                  |
| Panel B: Females                    |                     |                    |                       |
| Import exposure<br>(Eastern Europe) | -0.078<br>(0.081)   | -0.090<br>(0.098)  | -0.114<br>(0.125)     |
| Export exposure<br>(Eastern Europe) | 0.043<br>(0.055)    | 0.059<br>(0.064)   | 0.037<br>(0.086)      |
| Observations                        | 25,463              | 15,312             | 9,952                 |
| Mean of dep. var.                   | 0.031               | 0.028              | 0.030                 |
| Std. dev. of dep. var.              | 0.173               | 0.165              | 0.171                 |
| First stage F-statistic Import      | 32.1                | 17.3               | 22.5                  |
| First stage F-statistic Export      | 61                  | 32.6               | 73.9                  |

Notes - Standard errors are reported in parentheses and are clustered at the industry level. All models include individual, year  $\times$  federal state, year  $\times$  occupation, and 1-digit industry fixed effects. Further controls include age and its quadratic term, indicators for education, and household size.

\* Significant at 10%; \*\* significant at 5%; \*\*\* significant at 1%.

Table A.14: Effects of Trade Exposure on Completed Fertility (Using Average Trade Exposure Throughout the Period) – 2SLS Estimates

|                                     | (1)                | (2)               | (3)               |
|-------------------------------------|--------------------|-------------------|-------------------|
| Dep. Var.: Number of children       | Pooled             | Males             | Females           |
| Import exposure<br>(Eastern Europe) | -0.414*<br>(0.217) | -0.438<br>(0.280) | -0.278<br>(0.250) |
| Export exposure<br>(Eastern Europe) | 0.406**<br>(0.173) | 0.309<br>(0.228)  | 0.169<br>(0.192)  |
| Observations                        | 10,482             | 4,950             | 5,532             |
| Mean of dep. var.                   | 0.823              | 1.006             | 0.660             |
| Std. dev. of dep. var.              | 1.033              | 1.151             | 0.884             |
| First stage F-statistic Import      | 293                | 214.7             | 95.6              |
| First stage F-statistic Export      | 402.8              | 254.4             | 216.7             |

Notes - Robust standard errors are reported in parentheses. The sample is restricted to individuals born before 1974. All models include age and its quadratic term, indicators for education, and state fixed effects.

\* Significant at 10%; \*\* significant at 5%; \*\*\* significant at 1%.

Table A.15: Effects of Trade Exposure - Regional Analysis - 2SLS Estimates

|                                     | (1)                  | (2)                | (3)                 | (4)                       | (5)                  | (6)               | (7)              | (8)               |
|-------------------------------------|----------------------|--------------------|---------------------|---------------------------|----------------------|-------------------|------------------|-------------------|
|                                     | Income               | Hours worked       | Employment          | Labor force participation | Fertility            | Marriage          | Divorce          | Cohabitation      |
| Import exposure<br>(Eastern Europe) | -0.048***<br>(0.013) | -0.018*<br>(0.010) | -0.012**<br>(0.006) | -0.003<br>(0.003)         | -0.011***<br>(0.004) | -0.010<br>(0.006) | 0.002<br>(0.003) | 0.009<br>(0.008)  |
| Export exposure<br>(Eastern Europe) | 0.033***<br>(0.010)  | 0.012<br>(0.008)   | 0.012**<br>(0.005)  | 0.003<br>(0.003)          | 0.008***<br>(0.003)  | 0.006<br>(0.005)  | 0.000<br>(0.002) | -0.006<br>(0.007) |
| Observations                        | 119,171              | 115,156            | 133,662             | 133,662                   | 123,015              | 119,779           | 124,795          | 121,704           |
| Mean of dep. var.                   | 25,055               | 36.60              | 0.839               | 0.954                     | 0.043                | 0.557             | 0.056            | 0.288             |
| Std. dev. of dep. var.              | 18,019               | 14.36              | 0.367               | 0.210                     | 0.205                | 0.497             | 0.230            | 0.453             |
| First stage F-statistic Import      | 51.8                 | 55.6               | 50.2                | 50.2                      | 51.2                 | 51.7              | 50.5             | 53.8              |
| First stage F-statistic Export      | 41.6                 | 42.1               | 39.7                | 39.7                      | 40.6                 | 40.2              | 40.8             | 42.2              |

*Notes* - Standard errors are reported in parentheses and are clustered at the ROR-level. All models include individual, year  $\times$  ROR, year  $\times$  occupation, and 1-digit industry fixed effects. Further controls include age and its quadratic term, indicators for education, and household size.

\* Significant at 10%; \*\* significant at 5%; \*\*\* significant at 1%.



Table A.16: Effects of Trade Exposure on Marital Behavior - OLS Estimates

|                                     | (1)<br>Pooled     | (2)<br>Low-educated | (3)<br>High-educated | (4)<br>Males      | (5)<br>Females       |
|-------------------------------------|-------------------|---------------------|----------------------|-------------------|----------------------|
| Panel A: Marriage                   |                   |                     |                      |                   |                      |
| Import exposure<br>(Eastern Europe) | 0.023<br>(0.033)  | 0.038<br>(0.041)    | -0.065<br>(0.067)    | 0.008<br>(0.044)  | 0.068<br>(0.059)     |
| Export exposure<br>(Eastern Europe) | -0.035<br>(0.033) | -0.013<br>(0.040)   | -0.024<br>(0.057)    | -0.052<br>(0.038) | -0.031<br>(0.052)    |
| Observations                        | 51,941            | 38,473              | 13,265               | 27,713            | 24,208               |
| Mean of dep. var.                   | 0.619             | 0.595               | 0.692                | 0.620             | 0.618                |
| Std. dev. of dep. var.              | 0.486             | 0.491               | 0.462                | 0.485             | 0.486                |
| Panel B: Divorce                    |                   |                     |                      |                   |                      |
| Import exposure<br>(Eastern Europe) | -0.027<br>(0.019) | -0.035<br>(0.021)   | -0.004<br>(0.037)    | -0.017<br>(0.026) | -0.060***<br>(0.022) |
| Export exposure<br>(Eastern Europe) | 0.002<br>(0.017)  | -0.003<br>(0.019)   | 0.011<br>(0.019)     | 0.013<br>(0.023)  | -0.005<br>(0.022)    |
| Observations                        | 54,965            | 41,382              | 13,371               | 29,543            | 25,402               |
| Mean of dep. var.                   | 0.057             | 0.061               | 0.045                | 0.043             | 0.074                |
| Std. dev. of dep. var.              | 0.233             | 0.240               | 0.208                | 0.203             | 0.262                |
| Panel C: Cohabitation               |                   |                     |                      |                   |                      |
| Import exposure<br>(Eastern Europe) | -0.016<br>(0.045) | -0.021<br>(0.058)   | 0.038<br>(0.090)     | 0.020<br>(0.055)  | -0.118*<br>(0.064)   |
| Export exposure<br>(Eastern Europe) | 0.059<br>(0.038)  | 0.035<br>(0.048)    | 0.086<br>(0.069)     | 0.046<br>(0.038)  | 0.120*<br>(0.061)    |
| Observations                        | 54,904            | 41,320              | 13,371               | 29,487            | 25,397               |
| Mean of dep. var.                   | 0.222             | 0.226               | 0.207                | 0.202             | 0.245                |
| Std. dev. of dep. var.              | 0.416             | 0.418               | 0.405                | 0.402             | 0.430                |

*Notes* - Standard errors are reported in parentheses and are clustered at the industry level. All models include individual, year  $\times$  federal state, year  $\times$  occupation, and 1-digit industry fixed effects. Further controls include age and its quadratic term, indicators for education, and household size.

\* Significant at 10%; \*\* significant at 5%; \*\*\* significant at 1%.

Table A.17: Effects of Trade Exposure on Marital Behavior, by Education and Gender - 2SLS Estimates

|                                     | (1)               | (2)                | (3)               | (4)               | (5)               | (6)                |
|-------------------------------------|-------------------|--------------------|-------------------|-------------------|-------------------|--------------------|
|                                     | Pooled            |                    | Low-educated      |                   | High-educated     |                    |
|                                     | Males             | Females            | Males             | Females           | Males             | Females            |
| Panel A: Marriage                   |                   |                    |                   |                   |                   |                    |
| Import exposure<br>(Eastern Europe) | -0.020<br>(0.071) | 0.178<br>(0.138)   | -0.000<br>(0.091) | 0.236<br>(0.195)  | -0.069<br>(0.184) | -0.233<br>(0.307)  |
| Export exposure<br>(Eastern Europe) | -0.028<br>(0.056) | -0.114<br>(0.095)  | -0.022<br>(0.074) | -0.112<br>(0.122) | -0.067<br>(0.126) | 0.033<br>(0.205)   |
| Observations                        | 27,713            | 24,208             | 20,536            | 17,904            | 6,984             | 6,164              |
| Mean of dep. var.                   | 0.620             | 0.618              | 0.590             | 0.600             | 0.710             | 0.673              |
| Std. dev. of dep. var.              | 0.485             | 0.486              | 0.492             | 0.490             | 0.454             | 0.469              |
| Panel B: Divorce                    |                   |                    |                   |                   |                   |                    |
| Import exposure<br>(Eastern Europe) | -0.069<br>(0.055) | -0.227*<br>(0.130) | -0.068<br>(0.072) | -0.219<br>(0.150) | -0.095<br>(0.116) | -0.190<br>(0.168)  |
| Export exposure<br>(Eastern Europe) | 0.053<br>(0.042)  | 0.115<br>(0.094)   | 0.054<br>(0.056)  | 0.085<br>(0.111)  | 0.058<br>(0.078)  | 0.211**<br>(0.092) |
| Observations                        | 29,543            | 25,402             | 22,285            | 19,064            | 7,062             | 6,189              |
| Mean of dep. var.                   | 0.043             | 0.074              | 0.046             | 0.079             | 0.034             | 0.058              |
| Std. dev. of dep. var.              | 0.203             | 0.262              | 0.210             | 0.270             | 0.180             | 0.234              |
| Panel C: Cohabitation               |                   |                    |                   |                   |                   |                    |
| Import exposure<br>(Eastern Europe) | -0.106<br>(0.138) | -0.228<br>(0.197)  | -0.130<br>(0.134) | -0.234<br>(0.228) | -0.130<br>(0.299) | -0.092<br>(0.237)  |
| Export exposure<br>(Eastern Europe) | 0.147<br>(0.125)  | 0.202<br>(0.132)   | 0.144<br>(0.120)  | 0.179<br>(0.156)  | 0.242<br>(0.221)  | 0.291*<br>(0.148)  |
| Observations                        | 29,487            | 25,397             | 22,230            | 19,059            | 7,087             | 6,186              |
| Mean of dep. var.                   | 0.202             | 0.245              | 0.204             | 0.252             | 0.193             | 0.222              |
| Std. dev. of dep. var.              | 0.402             | 0.430              | 0.403             | 0.434             | 0.395             | 0.416              |

Notes - Standard errors are reported in parentheses and are clustered at the industry level. All models include individual, year  $\times$  federal state, year  $\times$  occupation, and 1-digit industry fixed effects. Further controls include age and its quadratic term, indicators for education, and household size.

\* Significant at 10%; \*\* significant at 5%; \*\*\* significant at 1%.

Table A.18: Effects of Trade Exposure on Fertility – Exposure to China - 2SLS Estimates

|                                | (1)                | (2)               | (3)                | (4)                 | (5)               |
|--------------------------------|--------------------|-------------------|--------------------|---------------------|-------------------|
|                                | Pooled             | Low-educated      | High-educated      | Males               | Females           |
| Panel A: Overall Fertility     |                    |                   |                    |                     |                   |
| Import exposure (China)        | 0.015<br>(0.037)   | -0.012<br>(0.039) | 0.122<br>(0.077)   | 0.023<br>(0.056)    | 0.003<br>(0.046)  |
| Export exposure (China)        | -0.114*<br>(0.059) | -0.091<br>(0.067) | -0.231*<br>(0.126) | -0.166**<br>(0.082) | -0.031<br>(0.080) |
| Observations                   | 51,598             | 38,563            | 12,849             | 26,118              | 25,460            |
| Mean of dep. var.              | 0.042              | 0.040             | 0.049              | 0.054               | 0.031             |
| Std. dev. of dep. var.         | 0.202              | 0.197             | 0.216              | 0.226               | 0.173             |
| First stage F-statistic Import | 86.2               | 103.3             | 24.9               | 85.3                | 150.6             |
| First stage F-statistic Export | 432.4              | 464.7             | 202.9              | 220                 | 664.6             |
| Panel B: Marital Fertility     |                    |                   |                    |                     |                   |
| Import exposure (China)        | 0.014<br>(0.058)   | -0.020<br>(0.055) | 0.127<br>(0.107)   | -0.007<br>(0.076)   | 0.006<br>(0.074)  |
| Export exposure (China)        | -0.049<br>(0.089)  | -0.011<br>(0.087) | -0.271<br>(0.175)  | -0.030<br>(0.092)   | -0.060<br>(0.136) |
| Observations                   | 35,534             | 25,930            | 9,510              | 17,755              | 17,737            |
| Mean of dep. var.              | 0.051              | 0.049             | 0.057              | 0.068               | 0.034             |
| Std. dev. of dep. var.         | 0.220              | 0.216             | 0.231              | 0.252               | 0.181             |
| First stage F-statistic Import | 90.3               | 98.3              | 30.2               | 69.4                | 119.7             |
| First stage F-statistic Export | 387.4              | 414.8             | 184.9              | 178.9               | 419.8             |
| Panel C: Nonmarital Fertility  |                    |                   |                    |                     |                   |
| Import exposure (China)        | -0.009<br>(0.036)  | -0.050<br>(0.047) | 0.161<br>(0.104)   | 0.062<br>(0.044)    | -0.032<br>(0.087) |
| Export exposure (China)        | -0.018<br>(0.064)  | 0.032<br>(0.088)  | -0.150<br>(0.140)  | -0.138<br>(0.095)   | -0.029<br>(0.120) |
| Observations                   | 15,632             | 12,272            | 3,141              | 8,123               | 7,434             |
| Mean of dep. var.              | 0.022              | 0.021             | 0.024              | 0.022               | 0.022             |
| Std. dev. of dep. var.         | 0.145              | 0.143             | 0.155              | 0.146               | 0.146             |
| First stage F-statistic Import | 45.8               | 56.5              | 10.6               | 93.8                | 140.3             |
| First stage F-statistic Export | 185.6              | 133.4             | 79.7               | 98.6                | 188.2             |

Notes - Standard errors are reported in parentheses and are clustered at the industry level. All models include individual, year  $\times$  federal state, year  $\times$  occupation, and 1-digit industry fixed effects. Further controls include age and its quadratic term, indicators for education, and household size.

\* Significant at 10%; \*\* significant at 5%; \*\*\* significant at 1%.

Table A.19: Effects of Trade Exposure on Marital Behavior – Exposure to China - 2SLS Estimates

|                                | (1)<br>Pooled     | (2)<br>Low-educated | (3)<br>High-educated | (4)<br>Males      | (5)<br>Females      |
|--------------------------------|-------------------|---------------------|----------------------|-------------------|---------------------|
| Panel A: Marriage              |                   |                     |                      |                   |                     |
| Import exposure (China)        | 0.014<br>(0.077)  | 0.107<br>(0.078)    | -0.357*<br>(0.200)   | -0.019<br>(0.100) | 0.158<br>(0.130)    |
| Export exposure (China)        | -0.069<br>(0.105) | -0.122<br>(0.140)   | 0.405<br>(0.247)     | -0.105<br>(0.175) | -0.172<br>(0.181)   |
| Observations                   | 51,876            | 38,428              | 13,246               | 27,650            | 24,206              |
| Mean of dep. var.              | 0.619             | 0.595               | 0.693                | 0.620             | 0.617               |
| Std. dev. of dep. var.         | 0.486             | 0.491               | 0.461                | 0.485             | 0.486               |
| First stage F-statistic Import | 73.9              | 85.1                | 24.8                 | 65.8              | 126                 |
| First stage F-statistic Export | 463.6             | 499.1               | 200.5                | 232.3             | 617.8               |
| Panel B: Divorce               |                   |                     |                      |                   |                     |
| Import exposure (China)        | -0.034<br>(0.050) | -0.080<br>(0.053)   | 0.167<br>(0.200)     | 0.044<br>(0.061)  | -0.184**<br>(0.090) |
| Export exposure (China)        | -0.016<br>(0.056) | 0.023<br>(0.070)    | -0.236<br>(0.239)    | -0.061<br>(0.089) | 0.088<br>(0.097)    |
| Observations                   | 54,899            | 41,336              | 13,352               | 29,480            | 25,399              |
| Mean of dep. var.              | 0.058             | 0.062               | 0.045                | 0.043             | 0.074               |
| Std. dev. of dep. var.         | 0.233             | 0.241               | 0.207                | 0.203             | 0.262               |
| First stage F-statistic Import | 82.6              | 97.8                | 24.9                 | 81.2              | 143.2               |
| First stage F-statistic Export | 423.9             | 454.8               | 203.5                | 215.8             | 663                 |
| Panel C: Cohabitation          |                   |                     |                      |                   |                     |
| Import exposure (China)        | -0.084<br>(0.100) | -0.130<br>(0.103)   | 0.363*<br>(0.182)    | -0.039<br>(0.075) | -0.144<br>(0.148)   |
| Export exposure (China)        | 0.221<br>(0.133)  | 0.223<br>(0.153)    | -0.305<br>(0.240)    | 0.137<br>(0.148)  | 0.432**<br>(0.193)  |
| Observations                   | 54,837            | 41,273              | 13,352               | 29,424            | 25,393              |
| Mean of dep. var.              | 0.222             | 0.226               | 0.206                | 0.202             | 0.245               |
| Std. dev. of dep. var.         | 0.415             | 0.418               | 0.405                | 0.401             | 0.430               |
| First stage F-statistic Import | 86.2              | 103.8               | 24.8                 | 80.7              | 148.9               |
| First stage F-statistic Export | 426               | 456.6               | 200                  | 216.1             | 668                 |

Notes - Standard errors are reported in parentheses and are clustered at the industry level. All models include individual, year  $\times$  federal state, year  $\times$  occupation, and 1-digit industry fixed effects. Further controls include age and its quadratic term, indicators for education, and household size.

\* Significant at 10%; \*\* significant at 5%; \*\*\* significant at 1%.

Table A.20: Effects of Trade Exposure on Labor Market Outcomes - 1991-2007 - 2SLS Estimates

|                                     | (1)<br>Pooled        | (2)<br>Low-educated  | (3)<br>High-educated | (4)<br>Males         | (5)<br>Females    |
|-------------------------------------|----------------------|----------------------|----------------------|----------------------|-------------------|
| Panel A: Income                     |                      |                      |                      |                      |                   |
| Import exposure<br>(Eastern Europe) | -0.336**<br>(0.130)  | -0.267*<br>(0.155)   | -0.173<br>(0.222)    | -0.463***<br>(0.132) | 0.128<br>(0.428)  |
| Export exposure<br>(Eastern Europe) | 0.281***<br>(0.091)  | 0.236**<br>(0.113)   | 0.149<br>(0.159)     | 0.359***<br>(0.094)  | -0.063<br>(0.302) |
| Observations                        | 46,158               | 35,040               | 10,927               | 25,534               | 20,624            |
| Mean of dep. var.                   | 22,217               | 19,891               | 29,802               | 26,648               | 16,731            |
| Std. dev. of dep. var.              | 13,777               | 11,196               | 17,920               | 14,720               | 10,106            |
| First stage F-statistic Import      | 57.9                 | 57.9                 | 22.3                 | 68.9                 | 19.1              |
| First stage F-statistic Export      | 93.5                 | 70.6                 | 27.9                 | 128.5                | 29.4              |
| Panel B: Hours Worked               |                      |                      |                      |                      |                   |
| Import exposure<br>(Eastern Europe) | -0.335**<br>(0.137)  | -0.205<br>(0.160)    | -0.485**<br>(0.186)  | -0.408***<br>(0.131) | -0.055<br>(0.365) |
| Export exposure<br>(Eastern Europe) | 0.257***<br>(0.095)  | 0.166<br>(0.112)     | 0.352**<br>(0.146)   | 0.329***<br>(0.100)  | 0.027<br>(0.238)  |
| Observations                        | 47,994               | 36,418               | 11,398               | 26,178               | 21,816            |
| Mean of dep. var.                   | 38.23                | 37.51                | 40.64                | 42.44                | 33.19             |
| Std. dev. of dep. var.              | 12.77                | 12.56                | 13.01                | 10.70                | 13.22             |
| First stage F-statistic Import      | 62.4                 | 60.4                 | 25.4                 | 70.5                 | 22.7              |
| First stage F-statistic Export      | 89.8                 | 69.4                 | 31.2                 | 125                  | 32.3              |
| Panel C: Employment                 |                      |                      |                      |                      |                   |
| Import exposure<br>(Eastern Europe) | -0.320***<br>(0.109) | -0.435***<br>(0.134) | -0.009<br>(0.159)    | -0.282**<br>(0.128)  | -0.195<br>(0.231) |
| Export exposure<br>(Eastern Europe) | 0.243***<br>(0.087)  | 0.322***<br>(0.104)  | 0.011<br>(0.124)     | 0.216*<br>(0.111)    | 0.131<br>(0.171)  |
| Observations                        | 63,604               | 49,836               | 13,586               | 31,370               | 32,234            |
| Mean of dep. var.                   | 0.732                | 0.703                | 0.843                | 0.826                | 0.641             |
| Std. dev. of dep. var.              | 0.443                | 0.457                | 0.364                | 0.379                | 0.480             |
| First stage F-statistic Import      | 47.1                 | 44.7                 | 25.8                 | 58.9                 | 20.9              |
| First stage F-statistic Export      | 64.6                 | 50.6                 | 30.7                 | 104.8                | 29.2              |

Notes - Standard errors are reported in parentheses and are clustered at the industry level. All models include individual, year  $\times$  federal state, year  $\times$  occupation, and 1-digit industry fixed effects. Further controls include age and its quadratic term, indicators for education, and household size.

\* Significant at 10%; \*\* significant at 5%; \*\*\* significant at 1%.

Table A.21: Effects of Trade Exposure on Labor Force Participation - 1991-2007 - 2SLS Estimates

|                                     | (1)<br>Pooled     | (2)<br>Low-educated | (3)<br>High-educated | (4)<br>Males      | (5)<br>Females   |
|-------------------------------------|-------------------|---------------------|----------------------|-------------------|------------------|
| Import exposure<br>(Eastern Europe) | -0.176<br>(0.125) | -0.213<br>(0.141)   | -0.055<br>(0.143)    | -0.191<br>(0.125) | 0.008<br>(0.204) |
| Export exposure<br>(Eastern Europe) | 0.142<br>(0.102)  | 0.169<br>(0.113)    | 0.044<br>(0.113)     | 0.153<br>(0.110)  | 0.002<br>(0.148) |
| Observations                        | 63,604            | 49,836              | 13,586               | 31,370            | 32,234           |
| Mean of dep. var.                   | 0.807             | 0.789               | 0.875                | 0.879             | 0.738            |
| Std. dev. of dep. var.              | 0.394             | 0.408               | 0.331                | 0.326             | 0.440            |
| First stage F-statistic Import      | 47.1              | 44.7                | 25.8                 | 58.9              | 20.9             |
| First stage F-statistic Export      | 64.6              | 50.5                | 30.7                 | 104.8             | 29.2             |

*Notes* - Standard errors are reported in parentheses and are clustered at the industry level. All models include individual, year  $\times$  federal state, year  $\times$  occupation, and 1-digit industry fixed effects. Further controls include age and its quadratic term, indicators for education, and household size.

\* Significant at 10%; \*\* significant at 5%; \*\*\* significant at 1%.

Table A.22: Effects of Trade Exposure on Fertility - 1991-2007 - 2SLS Estimates

|                                     | (1)<br>Pooled       | (2)<br>Low-educated | (3)<br>High-educated | (4)<br>Males        | (5)<br>Females    |
|-------------------------------------|---------------------|---------------------|----------------------|---------------------|-------------------|
| Panel A: Overall Fertility          |                     |                     |                      |                     |                   |
| Import exposure<br>(Eastern Europe) | -0.156**<br>(0.060) | -0.146**<br>(0.064) | -0.259<br>(0.197)    | -0.157**<br>(0.070) | -0.095<br>(0.098) |
| Export exposure<br>(Eastern Europe) | 0.092**<br>(0.045)  | 0.095*<br>(0.049)   | 0.126<br>(0.140)     | 0.086<br>(0.054)    | 0.058<br>(0.073)  |
| Observations                        | 45,505              | 34,342              | 10,995               | 23,171              | 22,334            |
| Mean of dep. var.                   | 0.045               | 0.042               | 0.052                | 0.056               | 0.033             |
| Std. dev. of dep. var.              | 0.206               | 0.201               | 0.221                | 0.230               | 0.178             |
| First stage F-statistic Import      | 58.8                | 57.8                | 25.2                 | 65.9                | 22.8              |
| First stage F-statistic Export      | 93.4                | 71.9                | 34.6                 | 133                 | 33.2              |
| Panel B: Marital Fertility          |                     |                     |                      |                     |                   |
| Import exposure<br>(Eastern Europe) | -0.152*<br>(0.076)  | -0.148**<br>(0.072) | -0.259<br>(0.171)    | -0.185**<br>(0.091) | -0.070<br>(0.109) |
| Export exposure<br>(Eastern Europe) | 0.105*<br>(0.058)   | 0.114**<br>(0.056)  | 0.148<br>(0.128)     | 0.125*<br>(0.074)   | 0.050<br>(0.081)  |
| Observations                        | 30,966              | 22,774              | 8,124                | 15,601              | 15,365            |
| Mean of dep. var.                   | 0.054               | 0.052               | 0.059                | 0.072               | 0.036             |
| Std. dev. of dep. var.              | 0.226               | 0.222               | 0.237                | 0.259               | 0.186             |
| First stage F-statistic Import      | 60.9                | 68.8                | 16.7                 | 59.4                | 31.8              |
| First stage F-statistic Export      | 101.7               | 84.3                | 21.8                 | 101                 | 78.6              |
| Panel C: Nonmarital Fertility       |                     |                     |                      |                     |                   |
| Import exposure<br>(Eastern Europe) | -0.105<br>(0.096)   | -0.144*<br>(0.085)  | -0.045<br>(0.411)    | -0.138<br>(0.130)   | -0.022<br>(0.155) |
| Export exposure<br>(Eastern Europe) | 0.069<br>(0.075)    | 0.092<br>(0.072)    | 0.051<br>(0.267)     | 0.090<br>(0.096)    | 0.010<br>(0.120)  |
| Observations                        | 14,119              | 11,232              | 2,733                | 7,380               | 6,720             |
| Mean of dep. var.                   | 0.022               | 0.021               | 0.024                | 0.022               | 0.022             |
| Std. dev. of dep. var.              | 0.145               | 0.143               | 0.155                | 0.146               | 0.145             |
| First stage F-statistic Import      | 18.1                | 13.6                | 59.9                 | 51.3                | 7.5               |
| First stage F-statistic Export      | 28.8                | 27.6                | 72.2                 | 87.5                | 14.2              |

Notes - Standard errors are reported in parentheses and are clustered at the industry level. All models include individual, year  $\times$  federal state, year  $\times$  occupation, and 1-digit industry fixed effects. Further controls include age and its quadratic term, indicators for education, and household size.

\* Significant at 10%; \*\* significant at 5%; \*\*\* significant at 1%.

Table A.23: Effects of Trade Exposure on Marriage - 1991-2007 - 2SLS Estimates

|                                     | (1)<br>Pooled     | (2)<br>Low-educated | (3)<br>High-educated | (4)<br>Males      | (5)<br>Females    |
|-------------------------------------|-------------------|---------------------|----------------------|-------------------|-------------------|
| Panel A: Marriage                   |                   |                     |                      |                   |                   |
| Import exposure<br>(Eastern Europe) | 0.004<br>(0.076)  | 0.140<br>(0.089)    | -0.263<br>(0.167)    | -0.009<br>(0.087) | 0.237<br>(0.165)  |
| Export exposure<br>(Eastern Europe) | -0.003<br>(0.064) | -0.060<br>(0.077)   | 0.075<br>(0.108)     | -0.021<br>(0.071) | -0.140<br>(0.122) |
| Observations                        | 45,785            | 34,209              | 11,390               | 24,703            | 21,082            |
| Mean of dep. var.                   | 0.611             | 0.586               | 0.690                | 0.612             | 0.609             |
| Std. dev. of dep. var.              | 0.488             | 0.493               | 0.462                | 0.487             | 0.488             |
| First stage F-statistic Import      | 59.1              | 57.6                | 26.8                 | 73.9              | 21.2              |
| First stage F-statistic Export      | 90.8              | 70.4                | 32.4                 | 119.3             | 33.9              |
| Panel B: Divorce                    |                   |                     |                      |                   |                   |
| Import exposure<br>(Eastern Europe) | -0.097<br>(0.069) | -0.119<br>(0.080)   | -0.061<br>(0.140)    | -0.063<br>(0.058) | -0.183<br>(0.145) |
| Export exposure<br>(Eastern Europe) | 0.060<br>(0.053)  | 0.063<br>(0.063)    | 0.049<br>(0.083)     | 0.052<br>(0.042)  | 0.087<br>(0.111)  |
| Observations                        | 48,811            | 37,116              | 11,501               | 26,535            | 22,276            |
| Mean of dep. var.                   | 0.056             | 0.059               | 0.046                | 0.043             | 0.072             |
| Std. dev. of dep. var.              | 0.231             | 0.237               | 0.210                | 0.204             | 0.259             |
| First stage F-statistic Import      | 62.9              | 61.3                | 24.9                 | 70.5              | 23.4              |
| First stage F-statistic Export      | 90.1              | 70.7                | 31.4                 | 125.7             | 33.1              |
| Panel C: Cohabitation               |                   |                     |                      |                   |                   |
| Import exposure<br>(Eastern Europe) | -0.019<br>(0.095) | -0.097<br>(0.097)   | 0.283<br>(0.229)     | 0.030<br>(0.108)  | -0.283<br>(0.185) |
| Export exposure<br>(Eastern Europe) | 0.049<br>(0.076)  | 0.094<br>(0.081)    | -0.100<br>(0.151)    | 0.011<br>(0.096)  | 0.254*<br>(0.128) |
| Observations                        | 48,750            | 37,057              | 11,499               | 26,481            | 22,269            |
| Mean of dep. var.                   | 0.225             | 0.229               | 0.207                | 0.204             | 0.250             |
| Std. dev. of dep. var.              | 0.417             | 0.420               | 0.405                | 0.403             | 0.433             |
| First stage F-statistic Import      | 62.9              | 61.7                | 25                   | 71.8              | 22.7              |
| First stage F-statistic Export      | 91.9              | 72.2                | 31.5                 | 128.9             | 33.2              |

Notes - Standard errors are reported in parentheses and are clustered at the industry level. All models include individual, year  $\times$  federal state, year  $\times$  occupation, and 1-digit industry fixed effects. Further controls include age and its quadratic term, indicators for education, and household size.

\* Significant at 10%; \*\* significant at 5%; \*\*\* significant at 1%.



Table A.24: Effects of Trade Exposure on Fertility, by Education and Gender - 2SLS Estimates - Individuals aged 17-44

|                                     | (1)<br>Pooled       | (2)<br>Low-educated | (3)<br>High-educated | (4)<br>Males        | (5)<br>Females    |
|-------------------------------------|---------------------|---------------------|----------------------|---------------------|-------------------|
| Panel A: Overall Fertility          |                     |                     |                      |                     |                   |
| Import exposure<br>(Eastern Europe) | -0.111**<br>(0.044) | -0.118**<br>(0.055) | -0.110<br>(0.137)    | -0.126**<br>(0.051) | -0.055<br>(0.077) |
| Export exposure<br>(Eastern Europe) | 0.055*<br>(0.032)   | 0.064<br>(0.041)    | 0.032<br>(0.089)     | 0.058<br>(0.038)    | 0.029<br>(0.053)  |
| Observations                        | 52,927              | 39,875              | 12,870               | 26,757              | 26,150            |
| Mean of dep. var.                   | 0.042               | 0.039               | 0.049                | 0.053               | 0.030             |
| Std. dev. of dep. var.              | 0.200               | 0.194               | 0.216                | 0.223               | 0.171             |
| First stage F-statistic Import      | 89                  | 90.3                | 29.1                 | 110.6               | 28.5              |
| First stage F-statistic Export      | 78.4                | 67.6                | 33.4                 | 79.1                | 59.1              |
| Panel B: Marital Fertility          |                     |                     |                      |                     |                   |
| Import exposure<br>(Eastern Europe) | -0.124*<br>(0.064)  | -0.125*<br>(0.066)  | -0.126<br>(0.139)    | -0.152**<br>(0.071) | -0.063<br>(0.086) |
| Export exposure<br>(Eastern Europe) | 0.079*<br>(0.046)   | 0.086*<br>(0.050)   | 0.053<br>(0.095)     | 0.096*<br>(0.055)   | 0.037<br>(0.058)  |
| Observations                        | 35,610              | 25,995              | 9,521                | 17,794              | 17,774            |
| Mean of dep. var.                   | 0.051               | 0.049               | 0.056                | 0.068               | 0.034             |
| Std. dev. of dep. var.              | 0.220               | 0.216               | 0.231                | 0.252               | 0.181             |
| First stage F-statistic Import      | 119.5               | 129                 | 22.5                 | 96.2                | 70.2              |
| First stage F-statistic Export      | 89.6                | 97.4                | 22.8                 | 68.9                | 178.5             |
| Panel C: Nonmarital Fertility       |                     |                     |                      |                     |                   |
| Import exposure<br>(Eastern Europe) | 0.003<br>(0.060)    | -0.043<br>(0.060)   | 0.011<br>(0.208)     | 0.020<br>(0.078)    | 0.084<br>(0.141)  |
| Export exposure<br>(Eastern Europe) | -0.012<br>(0.043)   | 0.010<br>(0.045)    | 0.011<br>(0.120)     | -0.031<br>(0.055)   | -0.072<br>(0.094) |
| Observations                        | 16,890              | 13,524              | 3,152                | 8,733               | 8,091             |
| Mean of dep. var.                   | 0.020               | 0.019               | 0.025                | 0.020               | 0.021             |
| Std. dev. of dep. var.              | 0.141               | 0.138               | 0.155                | 0.141               | 0.142             |
| First stage F-statistic Import      | 24.4                | 19.2                | 14.8                 | 46.6                | 6.9               |
| First stage F-statistic Export      | 27.6                | 19.1                | 22.6                 | 56.1                | 8.2               |

Notes - Standard errors are reported in parentheses and are clustered at the industry level. All models include individual, year  $\times$  federal state, year  $\times$  occupation, and 1-digit industry fixed effects. Further controls include age and its quadratic term, indicators for education, and household size.

\* Significant at 10%; \*\* significant at 5%; \*\*\* significant at 1%.

Table A.25: Effects of Trade Exposure on Fertility, by Education and Gender - 2SLS Estimates - Individuals aged 20-40

|                                     | (1)<br>Pooled        | (2)<br>Low-educated | (3)<br>High-educated | (4)<br>Males        | (5)<br>Females    |
|-------------------------------------|----------------------|---------------------|----------------------|---------------------|-------------------|
| Panel A: Overall Fertility          |                      |                     |                      |                     |                   |
| Import exposure<br>(Eastern Europe) | -0.215***<br>(0.069) | -0.190**<br>(0.074) | -0.365<br>(0.259)    | -0.197**<br>(0.075) | -0.142<br>(0.131) |
| Export exposure<br>(Eastern Europe) | 0.121**<br>(0.050)   | 0.111*<br>(0.057)   | 0.163<br>(0.161)     | 0.100*<br>(0.057)   | 0.082<br>(0.088)  |
| Observations                        | 40,204               | 30,601              | 9,379                | 20,464              | 19,685            |
| Mean of dep. var.                   | 0.052                | 0.049               | 0.062                | 0.065               | 0.039             |
| Std. dev. of dep. var.              | 0.223                | 0.217               | 0.242                | 0.247               | 0.194             |
| First stage F-statistic Import      | 59.7                 | 58.1                | 15.6                 | 104.4               | 14                |
| First stage F-statistic Export      | 67.3                 | 56.6                | 26.1                 | 80.4                | 32.9              |
| Panel B: Marital Fertility          |                      |                     |                      |                     |                   |
| Import exposure<br>(Eastern Europe) | -0.258**<br>(0.101)  | -0.210**<br>(0.095) | -0.413<br>(0.271)    | -0.295**<br>(0.121) | -0.117<br>(0.144) |
| Export exposure<br>(Eastern Europe) | 0.179**<br>(0.079)   | 0.158*<br>(0.080)   | 0.197<br>(0.187)     | 0.203**<br>(0.101)  | 0.072<br>(0.098)  |
| Observations                        | 25,276               | 18,724              | 6,421                | 12,736              | 12,479            |
| Mean of dep. var.                   | 0.068                | 0.065               | 0.076                | 0.090               | 0.047             |
| Std. dev. of dep. var.              | 0.253                | 0.248               | 0.267                | 0.286               | 0.211             |
| First stage F-statistic Import      | 93                   | 84.1                | 10.2                 | 87.8                | 34.2              |
| First stage F-statistic Export      | 79.2                 | 74.2                | 15.9                 | 64.8                | 110.9             |
| Panel C: Nonmarital Fertility       |                      |                     |                      |                     |                   |
| Import exposure<br>(Eastern Europe) | -0.048<br>(0.084)    | -0.096<br>(0.073)   | -0.059<br>(0.375)    | -0.047<br>(0.104)   | 0.017<br>(0.167)  |
| Export exposure<br>(Eastern Europe) | 0.018<br>(0.060)     | 0.040<br>(0.055)    | 0.045<br>(0.202)     | 0.006<br>(0.071)    | -0.019<br>(0.112) |
| Observations                        | 14,491               | 11,532              | 2,771                | 7,500               | 6,944             |
| Mean of dep. var.                   | 0.022                | 0.021               | 0.027                | 0.022               | 0.023             |
| Std. dev. of dep. var.              | 0.150                | 0.146               | 0.162                | 0.149               | 0.151             |
| First stage F-statistic Import      | 19.8                 | 18.9                | 29.9                 | 58.4                | 11.2              |
| First stage F-statistic Export      | 26.6                 | 29.2                | 37.7                 | 50.2                | 18.9              |

Notes - Standard errors are reported in parentheses and are clustered at the industry level. All models include individual, year  $\times$  federal state, year  $\times$  occupation, and 1-digit industry fixed effects. Further controls include age and its quadratic term, indicators for education, and household size.

\* Significant at 10%; \*\* significant at 5%; \*\*\* significant at 1%.

Table A.26: Effects of Trade Exposure on Fertility, by Education and Gender - 2SLS Estimates - Individuals aged 20-50

|                                     | (1)<br>Pooled      | (2)<br>Low-educated | (3)<br>High-educated | (4)<br>Males       | (5)<br>Females    |
|-------------------------------------|--------------------|---------------------|----------------------|--------------------|-------------------|
| Panel A: Overall Fertility          |                    |                     |                      |                    |                   |
| Import exposure<br>(Eastern Europe) | -0.056*<br>(0.029) | -0.076**<br>(0.035) | 0.001<br>(0.092)     | -0.066*<br>(0.036) | -0.032<br>(0.046) |
| Export exposure<br>(Eastern Europe) | 0.023<br>(0.021)   | 0.039<br>(0.026)    | -0.026<br>(0.061)    | 0.024<br>(0.028)   | 0.017<br>(0.033)  |
| Observations                        | 66,563             | 49,125              | 17,246               | 33,480             | 33,072            |
| Mean of dep. var.                   | 0.033              | 0.032               | 0.037                | 0.042              | 0.023             |
| Std. dev. of dep. var.              | 0.180              | 0.176               | 0.189                | 0.202              | 0.153             |
| First stage F-statistic Import      | 106.5              | 113.2               | 45.8                 | 112.6              | 43.4              |
| First stage F-statistic Export      | 71.5               | 72.7                | 26.5                 | 61                 | 71.9              |
| Panel B: Marital Fertility          |                    |                     |                      |                    |                   |
| Import exposure<br>(Eastern Europe) | -0.049<br>(0.041)  | -0.061<br>(0.042)   | -0.020<br>(0.089)    | -0.069<br>(0.049)  | -0.023<br>(0.049) |
| Export exposure<br>(Eastern Europe) | 0.029<br>(0.030)   | 0.041<br>(0.031)    | -0.000<br>(0.061)    | 0.041<br>(0.038)   | 0.015<br>(0.034)  |
| Observations                        | 49,407             | 35,794              | 13,523               | 24,454             | 24,939            |
| Mean of dep. var.                   | 0.037              | 0.036               | 0.040                | 0.050              | 0.024             |
| Std. dev. of dep. var.              | 0.190              | 0.187               | 0.197                | 0.219              | 0.154             |
| First stage F-statistic Import      | 112.8              | 144.4               | 35.2                 | 99.4               | 55.1              |
| First stage F-statistic Export      | 72.4               | 89.7                | 22.1                 | 53.1               | 115.8             |
| Panel C: Nonmarital Fertility       |                    |                     |                      |                    |                   |
| Import exposure<br>(Eastern Europe) | -0.004<br>(0.054)  | -0.030<br>(0.053)   | -0.013<br>(0.158)    | -0.011<br>(0.071)  | 0.083<br>(0.115)  |
| Export exposure<br>(Eastern Europe) | -0.009<br>(0.040)  | 0.004<br>(0.040)    | 0.018<br>(0.094)     | -0.007<br>(0.051)  | -0.076<br>(0.083) |
| Observations                        | 16,705             | 12,945              | 3,550                | 8,793              | 7,844             |
| Mean of dep. var.                   | 0.020              | 0.019               | 0.022                | 0.020              | 0.020             |
| Std. dev. of dep. var.              | 0.141              | 0.139               | 0.148                | 0.141              | 0.142             |
| First stage F-statistic Import      | 34.7               | 27.3                | 25.7                 | 70.9               | 8.2               |
| First stage F-statistic Export      | 27.2               | 19.9                | 28.7                 | 51.6               | 10.9              |

Notes - Standard errors are reported in parentheses and are clustered at the industry level. All models include individual, year  $\times$  federal state, year  $\times$  occupation, and 1-digit industry fixed effects. Further controls include age and its quadratic term, indicators for education, and household size.

\* Significant at 10%; \*\* significant at 5%; \*\*\* significant at 1%.

Table A.27: Effects of Trade Exposure on Labor Market Outcomes and Fertility Behavior, Lagged Effects - 2SLS Estimates

| Dep. var.:                          | (1)<br>Income       | (2)<br>Hours worked  | (3)<br>Overall fertility | (4)<br>Marital fertility | (5)<br>Nonmarital fertility |
|-------------------------------------|---------------------|----------------------|--------------------------|--------------------------|-----------------------------|
| Import exposure<br>(Eastern Europe) | -0.304**<br>(0.118) | -0.333***<br>(0.118) | -0.200***<br>(0.058)     | -0.215***<br>(0.075)     | -0.122<br>(0.159)           |
| Export exposure<br>(Eastern Europe) | 0.145**<br>(0.062)  | 0.091<br>(0.059)     | 0.060<br>(0.039)         | 0.087<br>(0.052)         | 0.003<br>(0.103)            |
| Observations                        | 32,486              | 33,063               | 32,463                   | 22,975                   | 9,236                       |
| Mean of dep. var.                   | 25,148              | 37.88                | 0.0402                   | 0.046                    | 0.022                       |
| Std. dev. of dep. var.              | 15,456              | 13.14                | 0.196                    | 0.210                    | 0.148                       |
| First stage F-statistic Import      | 203.1               | 208.4                | 206.6                    | 245.6                    | 56.1                        |
| First stage F-statistic Export      | 126.9               | 125.2                | 122.5                    | 91.9                     | 147.7                       |

Notes - Standard errors are reported in parentheses and are clustered at the industry level. All models include individual, year  $\times$  federal state, year  $\times$  occupation, and 1-digit industry fixed effects. Further controls include age and its quadratic term, indicators for education, and household size. All estimates include controls for the lagged values of imports and exports at time  $t - 2$ ,  $t - 3$ ,  $t - 4$ , and  $t - 5$ .

\* Significant at 10%; \*\* significant at 5%; \*\*\* significant at 1%.

Table A.28: Effects of Trade Exposure on Income and Fertility, by School Track and Occupation Type - 2SLS Estimates

|                                  | (1)                 | (2)                 | (3)               | (4)                  | (5)                   | (6)                 | (7)               |
|----------------------------------|---------------------|---------------------|-------------------|----------------------|-----------------------|---------------------|-------------------|
|                                  | Pooled              | Low-educated        | High-educated     | Low-educated - Track | High-educated - Track | Blue collar         | White collar      |
| Panel A: Income                  |                     |                     |                   |                      |                       |                     |                   |
| Import exposure (Eastern Europe) | -0.352**<br>(0.137) | -0.336**<br>(0.161) | -0.079<br>(0.183) | -0.351*<br>(0.203)   | -0.056<br>(0.210)     | -0.355**<br>(0.156) | 0.080<br>(0.145)  |
| Export exposure (Eastern Europe) | 0.286***<br>(0.092) | 0.293**<br>(0.111)  | 0.063<br>(0.131)  | 0.288**<br>(0.134)   | 0.151<br>(0.134)      | 0.262**<br>(0.106)  | 0.068<br>(0.100)  |
| Observations                     | 52,180              | 39,185              | 12,784            | 16,018               | 35,506                | 22,889              | 27,057            |
| Mean of dep. var.                | 23,075              | 20,456              | 31,190            | 21,506               | 23,847                | 20,079              | 26,799            |
| Std. dev. of dep. var.           | 14,701              | 11,694              | 19,288            | 11,110               | 16,026                | 10,135              | 16,674            |
| First stage F-statistic Import   | 89.3                | 92.1                | 27.4              | 78                   | 42.1                  | 104.4               | 27                |
| First stage F-statistic Export   | 79.2                | 66.8                | 31.4              | 59.1                 | 60.5                  | 66.7                | 43.1              |
| Panel B: Overall Fertility       |                     |                     |                   |                      |                       |                     |                   |
| Import exposure (Eastern Europe) | -0.120**<br>(0.046) | -0.128**<br>(0.055) | -0.110<br>(0.137) | -0.139*<br>(0.076)   | -0.118<br>(0.078)     | -0.148**<br>(0.061) | -0.061<br>(0.098) |
| Export exposure (Eastern Europe) | 0.061*<br>(0.033)   | 0.070*<br>(0.041)   | 0.032<br>(0.089)  | 0.057<br>(0.055)     | 0.058<br>(0.051)      | 0.086*<br>(0.046)   | 0.016<br>(0.067)  |
| Observations                     | 51,664              | 38,609              | 12,868            | 15,392               | 35,660                | 22,210              | 27,054            |
| Mean of dep. var.                | 0.042               | 0.040               | 0.049             | 0.042                | 0.042                 | 0.0427              | 0.043             |
| Std. dev. of dep. var.           | 0.202               | 0.197               | 0.216             | 0.201                | 0.201                 | 0.202               | 0.205             |
| First stage F-statistic Import   | 95.1                | 96.1                | 29.1              | 82                   | 47                    | 106.8               | 27.1              |
| First stage F-statistic Export   | 81.9                | 70.6                | 33.4              | 66.1                 | 64.1                  | 73.8                | 43                |

Notes - Standard errors are reported in parentheses and are clustered at the industry level. All models include individual, year  $\times$  federal state, year  $\times$  occupation, and 1-digit industry fixed effects. Further controls include age and its quadratic term, indicators for education, and household size.

\* Significant at 10%; \*\* significant at 5%; \*\*\* significant at 1%.

Table A.29: Effects of Trade Exposure on Labor Market Outcomes - ROR-by-Year Fixed Effects - 2SLS Estimates

|                                     | (1)<br>Pooled        | (2)<br>Low-educated  | (3)<br>High-educated | (4)<br>Males         | (5)<br>Females    |
|-------------------------------------|----------------------|----------------------|----------------------|----------------------|-------------------|
| Panel A: Income                     |                      |                      |                      |                      |                   |
| Import exposure<br>(Eastern Europe) | -0.325**<br>(0.125)  | -0.276**<br>(0.129)  | -0.441<br>(0.266)    | -0.329***<br>(0.098) | 0.078<br>(0.352)  |
| Export exposure<br>(Eastern Europe) | 0.270***<br>(0.080)  | 0.249***<br>(0.092)  | 0.261<br>(0.189)     | 0.259***<br>(0.066)  | -0.011<br>(0.221) |
| Observations                        | 51,869               | 38,882               | 12,317               | 28,188               | 23,291            |
| Mean of dep. var.                   | 23,067               | 20,434               | 30,928               | 27,694               | 17,368            |
| Std. dev. of dep. var.              | 14,686               | 11,647               | 19,128               | 15,527               | 11,073            |
| First stage F-statistic Import      | 90.1                 | 85.8                 | 31.6                 | 113.2                | 21.8              |
| First stage F-statistic Export      | 81.9                 | 67.5                 | 37.6                 | 80.5                 | 35.4              |
| Panel B: Hours Worked               |                      |                      |                      |                      |                   |
| Import exposure<br>(Eastern Europe) | -0.293***<br>(0.105) | -0.203<br>(0.124)    | -0.430*<br>(0.243)   | -0.221**<br>(0.088)  | -0.109<br>(0.246) |
| Export exposure<br>(Eastern Europe) | 0.222***<br>(0.070)  | 0.173**<br>(0.082)   | 0.249<br>(0.181)     | 0.178***<br>(0.066)  | 0.081<br>(0.152)  |
| Observations                        | 53,729               | 40,291               | 12,772               | 28,808               | 24,543            |
| Mean of dep. var.                   | 38.11                | 37.37                | 40.47                | 42.54                | 32.94             |
| Std. dev. of dep. var.              | 12.87                | 12.67                | 13.11                | 10.66                | 13.28             |
| First stage F-statistic Import      | 97.3                 | 91.8                 | 35.3                 | 114.1                | 26.3              |
| First stage F-statistic Export      | 81.3                 | 69.4                 | 39.3                 | 81                   | 39.2              |
| Panel C: Employment                 |                      |                      |                      |                      |                   |
| Import exposure<br>(Eastern Europe) | -0.259***<br>(0.083) | -0.366***<br>(0.108) | -0.059<br>(0.179)    | -0.207**<br>(0.102)  | -0.226<br>(0.195) |
| Export exposure<br>(Eastern Europe) | 0.152**<br>(0.063)   | 0.221***<br>(0.080)  | 0.006<br>(0.124)     | 0.134<br>(0.081)     | 0.093<br>(0.128)  |
| Observations                        | 70,501               | 54,634               | 15,271               | 34,322               | 35,866            |
| Mean of dep. var.                   | 0.739                | 0.709                | 0.845                | 0.833                | 0.648             |
| Std. dev. of dep. var.              | 0.439                | 0.454                | 0.362                | 0.373                | 0.478             |
| First stage F-statistic Import      | 52.4                 | 56.1                 | 46.7                 | 100.6                | 17.5              |
| First stage F-statistic Export      | 71.9                 | 61.2                 | 45.5                 | 79.6                 | 38.4              |

Notes - Standard errors are reported in parentheses and are clustered at the industry level. All models include individual, year  $\times$  ROR, year  $\times$  occupation, and 1-digit industry fixed effects. Further controls include age and its quadratic term, indicators for education, and household size.

\* Significant at 10%; \*\* significant at 5%; \*\*\* significant at 1%.

Table A.30: Effects of Trade Exposure on Labor Force Participation - ROR-by-Year Fixed Effects - 2SLS Estimates

|                                     | (1)<br>Pooled     | (2)<br>Low-educated | (3)<br>High-educated | (4)<br>Males       | (5)<br>Females    |
|-------------------------------------|-------------------|---------------------|----------------------|--------------------|-------------------|
| Import exposure<br>(Eastern Europe) | -0.137<br>(0.083) | -0.157<br>(0.096)   | -0.093<br>(0.171)    | -0.169*<br>(0.085) | 0.005<br>(0.146)  |
| Export exposure<br>(Eastern Europe) | 0.076<br>(0.066)  | 0.095<br>(0.075)    | 0.043<br>(0.122)     | 0.110<br>(0.073)   | -0.031<br>(0.098) |
| Observations                        | 70,501            | 54,634              | 15,271               | 34,322             | 35,866            |
| Mean of dep. var.                   | 0.814             | 0.795               | 0.879                | 0.883              | 0.746             |
| Std. dev. of dep. var.              | 0.389             | 0.404               | 0.326                | 0.321              | 0.435             |
| First stage F-statistic Import      | 52.4              | 56.1                | 46.7                 | 100.6              | 17.5              |
| First stage F-statistic Export      | 71.9              | 61.2                | 45.5                 | 79.6               | 38.4              |

*Notes* - Standard errors are reported in parentheses and are clustered at the industry level. All models include individual, year  $\times$  ROR, year  $\times$  occupation, and 1-digit industry fixed effects. Further controls include age and its quadratic term, indicators for education, and household size.

\* Significant at 10%; \*\* significant at 5%; \*\*\* significant at 1%.

Table A.31: Effects of Trade Exposure on Fertility - ROR-by-Year Fixed Effects - 2SLS Estimates

|                                     | (1)                 | (2)                 | (3)               | (4)                | (5)               |
|-------------------------------------|---------------------|---------------------|-------------------|--------------------|-------------------|
|                                     | Pooled              | Low-educated        | High-educated     | Males              | Females           |
| Panel A: Overall Fertility          |                     |                     |                   |                    |                   |
| Import exposure<br>(Eastern Europe) | -0.120**<br>(0.049) | -0.130**<br>(0.055) | -0.145<br>(0.158) | -0.110*<br>(0.064) | -0.093<br>(0.089) |
| Export exposure<br>(Eastern Europe) | 0.059<br>(0.035)    | 0.079*<br>(0.042)   | 0.038<br>(0.099)  | 0.043<br>(0.047)   | 0.054<br>(0.059)  |
| Observations                        | 51,328              | 38,292              | 12,381            | 25,835             | 25,115            |
| Mean of dep. var.                   | 0.042               | 0.040               | 0.048             | 0.054              | 0.031             |
| Std. dev. of dep. var.              | 0.202               | 0.197               | 0.215             | 0.226              | 0.174             |
| First stage F-statistic Import      | 95.5                | 89.2                | 39.9              | 115.2              | 26.7              |
| First stage F-statistic Export      | 83.8                | 69.9                | 45.1              | 84.2               | 40.4              |
| Panel B: Marital Fertility          |                     |                     |                   |                    |                   |
| Import exposure<br>(Eastern Europe) | -0.107<br>(0.069)   | -0.113<br>(0.071)   | -0.036<br>(0.149) | -0.112<br>(0.098)  | -0.031<br>(0.085) |
| Export exposure<br>(Eastern Europe) | 0.067<br>(0.049)    | 0.085<br>(0.053)    | 0.004<br>(0.106)  | 0.073<br>(0.072)   | 0.012<br>(0.058)  |
| Observations                        | 35,238              | 25,622              | 8,894             | 17,366             | 17,366            |
| Mean of dep. var.                   | 0.051               | 0.049               | 0.056             | 0.068              | 0.034             |
| Std. dev. of dep. var.              | 0.221               | 0.217               | 0.231             | 0.253              | 0.182             |
| First stage F-statistic Import      | 126.8               | 136                 | 25.6              | 99.8               | 61.6              |
| First stage F-statistic Export      | 100                 | 105.3               | 30.4              | 71.5               | 122.3             |
| Panel C: Nonmarital Fertility       |                     |                     |                   |                    |                   |
| Import exposure<br>(Eastern Europe) | -0.018<br>(0.092)   | -0.030<br>(0.087)   | -0.382<br>(0.622) | -0.025<br>(0.134)  | 0.007<br>(0.124)  |
| Export exposure<br>(Eastern Europe) | 0.011<br>(0.068)    | 0.013<br>(0.070)    | 0.217<br>(0.296)  | -0.006<br>(0.092)  | -0.047<br>(0.093) |
| Observations                        | 15,243              | 11,845              | 2,551             | 7,618              | 6,854             |
| Mean of dep. var.                   | 0.022               | 0.021               | 0.024             | 0.022              | 0.022             |
| Std. dev. of dep. var.              | 0.146               | 0.143               | 0.155             | 0.146              | 0.146             |
| First stage F-statistic Import      | 19.9                | 14.7                | 9.7               | 48.6               | 2.9               |
| First stage F-statistic Export      | 31                  | 31.7                | 17.6              | 64.1               | 6.5               |

Notes - Standard errors are reported in parentheses and are clustered at the industry level. All models include individual, year  $\times$  ROR, year  $\times$  occupation, and 1-digit industry fixed effects. Further controls include age and its quadratic term, indicators for education, and household size.

\* Significant at 10%; \*\* significant at 5%; \*\*\* significant at 1%.



Table A.32: Effects of Trade Exposure on Marital Behavior - ROR-by-Year Fixed Effects - 2SLS Estimates

|                                     | (1)<br>Pooled     | (2)<br>Low-educated | (3)<br>High-educated | (4)<br>Males      | (5)<br>Females     |
|-------------------------------------|-------------------|---------------------|----------------------|-------------------|--------------------|
| Panel A: Marriage                   |                   |                     |                      |                   |                    |
| Import exposure<br>(Eastern Europe) | -0.045<br>(0.073) | 0.044<br>(0.099)    | -0.294<br>(0.190)    | 0.038<br>(0.092)  | 0.130<br>(0.169)   |
| Export exposure<br>(Eastern Europe) | 0.013<br>(0.056)  | -0.004<br>(0.076)   | 0.078<br>(0.142)     | -0.070<br>(0.068) | -0.071<br>(0.110)  |
| Observations                        | 51,594            | 38,126              | 12,747               | 27,347            | 23,843             |
| Mean of dep. var.                   | 0.618             | 0.594               | 0.691                | 0.619             | 0.617              |
| Std. dev. of dep. var.              | 0.486             | 0.491               | 0.462                | 0.486             | 0.486              |
| First stage F-statistic Import      | 92                | 90.2                | 27.8                 | 169.2             | 27.8               |
| First stage F-statistic Export      | 89.6              | 74.7                | 31.6                 | 104.3             | 45.3               |
| Panel B: Divorce                    |                   |                     |                      |                   |                    |
| Import exposure<br>(Eastern Europe) | -0.104<br>(0.065) | -0.099<br>(0.080)   | -0.058<br>(0.135)    | -0.064<br>(0.067) | -0.216*<br>(0.117) |
| Export exposure<br>(Eastern Europe) | 0.058<br>(0.047)  | 0.041<br>(0.058)    | 0.066<br>(0.085)     | 0.046<br>(0.049)  | 0.097<br>(0.083)   |
| Observations                        | 54,619            | 41,058              | 12,895               | 29,184            | 25,059             |
| Mean of dep. var.                   | 0.057             | 0.061               | 0.045                | 0.043             | 0.074              |
| Std. dev. of dep. var.              | 0.233             | 0.241               | 0.208                | 0.204             | 0.262              |
| First stage F-statistic Import      | 98.9              | 92.3                | 35.8                 | 111.8             | 26.9               |
| First stage F-statistic Export      | 82.2              | 69.1                | 40.6                 | 80.7              | 40.1               |
| Panel C: Cohabitation               |                   |                     |                      |                   |                    |
| Import exposure<br>(Eastern Europe) | -0.124<br>(0.124) | -0.107<br>(0.101)   | 0.070<br>(0.224)     | -0.154<br>(0.142) | -0.178<br>(0.171)  |
| Export exposure<br>(Eastern Europe) | 0.141<br>(0.100)  | 0.104<br>(0.084)    | 0.146<br>(0.165)     | 0.193<br>(0.128)  | 0.150<br>(0.126)   |
| Observations                        | 54,553            | 40,991              | 12,893               | 29,129            | 25,050             |
| Mean of dep. var.                   | 0.222             | 0.227               | 0.207                | 0.203             | 0.246              |
| Std. dev. of dep. var.              | 0.416             | 0.419               | 0.406                | 0.402             | 0.430              |
| First stage F-statistic Import      | 99                | 92.8                | 36.3                 | 113.7             | 26.8               |
| First stage F-statistic Export      | 82.2              | 69.3                | 40.8                 | 80.9              | 40.5               |

Notes - Standard errors are reported in parentheses and are clustered at the industry level. All models include individual, year  $\times$  ROR, year  $\times$  occupation, and 1-digit industry fixed effects. Further controls include age and its quadratic term, indicators for education, and household size.

\* Significant at 10%; \*\* significant at 5%; \*\*\* significant at 1%.

Table A.33: Effects of Trade Exposure on Income and Fertility - 2SLS Estimates

| Dep. var.:                          | (1)                  | (2)                 | (3)                 | (4)                 |
|-------------------------------------|----------------------|---------------------|---------------------|---------------------|
|                                     | 1995<br>Income       | 1995<br>Fertility   | 1990<br>Income      | 1990<br>Fertility   |
| Import exposure<br>(Eastern Europe) | -0.395***<br>(0.143) | -0.099**<br>(0.048) | -0.364**<br>(0.137) | -0.133**<br>(0.054) |
| Export exposure<br>(Eastern Europe) | 0.322***<br>(0.099)  | 0.045<br>(0.034)    | 0.340***<br>(0.090) | 0.066<br>(0.040)    |
| Observations                        | 43,889               | 43,170              | 30,646              | 29,995              |
| Mean of dep. var.                   | 22,865               | 0.041               | 22,919              | 0.036               |
| Std. dev. of dep. var.              | 14,280               | 0.199               | 13,099              | 0.187               |
| First stage F-statistic Import      | 75.9                 | 82                  | 62.7                | 67.8                |
| First stage F-statistic Export      | 77.5                 | 80.2                | 62                  | 63                  |

*Notes* - Standard errors are reported in parentheses and are clustered at the industry level. In columns 1 (3) and 2 (4) the sample is restricted to individuals entering the SOEP before 1995 (1990). All models include individual, year  $\times$  federal state, year  $\times$  occupation fixed effects, and 1-digit industry fixed effects. Further controls include age and its quadratic term, indicators for education, and household size.

\* Significant at 10%; \*\* significant at 5%; \*\*\* significant at 1%.

Table A.34: Effects of Trade Exposure on Labor Market Outcomes - Falsification Test - 2SLS Estimates

|                                     | (1)<br>Pooled     | (2)<br>Low-educated | (3)<br>High-educated | (4)<br>Males      | (5)<br>Females    |
|-------------------------------------|-------------------|---------------------|----------------------|-------------------|-------------------|
| Panel A: Income                     |                   |                     |                      |                   |                   |
| Import exposure<br>(Eastern Europe) | -0.171<br>(0.249) | -0.363<br>(0.267)   | 0.820<br>(0.709)     | -0.114<br>(0.315) | -0.293<br>(0.338) |
| Export exposure<br>(Eastern Europe) | 0.142<br>(0.177)  | 0.286<br>(0.181)    | -0.426<br>(0.535)    | 0.026<br>(0.213)  | 0.227<br>(0.185)  |
| Observations                        | 19,856            | 14,843              | 4,903                | 11,553            | 8,273             |
| Mean of dep. var.                   | 16,539            | 15,551              | 19,540               | 18,965            | 13,158            |
| Std. dev. of dep. var.              | 11,027            | 9,580               | 14,119               | 11,685            | 9,016             |
| First stage F-statistic Import      | 88.2              | 73.9                | 25.3                 | 127.8             | 32.8              |
| First stage F-statistic Export      | 74.2              | 73.4                | 36.6                 | 93.4              | 58.6              |
| Panel B: Hours Worked               |                   |                     |                      |                   |                   |
| Import exposure<br>(Eastern Europe) | 0.012<br>(0.186)  | -0.042<br>(0.170)   | 0.297<br>(0.576)     | -0.234<br>(0.227) | 0.081<br>(0.365)  |
| Export exposure<br>(Eastern Europe) | -0.016<br>(0.128) | 0.017<br>(0.111)    | -0.097<br>(0.427)    | 0.020<br>(0.163)  | 0.102<br>(0.186)  |
| Observations                        | 20,946            | 15,536              | 5,299                | 11,984            | 8,935             |
| Mean of dep. var.                   | 36.08             | 36.05               | 36.21                | 39.34             | 31.72             |
| Std. dev. of dep. var.              | 13.65             | 12.85               | 15.71                | 12.59             | 13.80             |
| First stage F-statistic Import      | 91.6              | 76.4                | 29.2                 | 116.9             | 37.1              |
| First stage F-statistic Export      | 76.1              | 73.9                | 37.9                 | 92.2              | 69.5              |
| Panel C: Employment                 |                   |                     |                      |                   |                   |
| Import exposure<br>(Eastern Europe) | -0.219<br>(0.177) | -0.299<br>(0.185)   | 0.122<br>(0.298)     | -0.048<br>(0.156) | -0.250<br>(0.244) |
| Export exposure<br>(Eastern Europe) | 0.116<br>(0.117)  | 0.158<br>(0.124)    | 0.023<br>(0.214)     | -0.039<br>(0.115) | 0.172<br>(0.130)  |
| Observations                        | 32,194            | 24,113              | 7,973                | 15,355            | 16,813            |
| Mean of dep. var.                   | 0.636             | 0.644               | 0.614                | 0.722             | 0.557             |
| Std. dev. of dep. var.              | 0.481             | 0.479               | 0.487                | 0.448             | 0.497             |
| First stage F-statistic Import      | 63.7              | 59.3                | 39.4                 | 135.7             | 29.2              |
| First stage F-statistic Export      | 56.4              | 52.2                | 44.2                 | 99.2              | 45.7              |

Notes - Standard errors are reported in parentheses and are clustered at the industry level. All models include individual, year  $\times$  federal state, year  $\times$  occupation, and 1-digit industry fixed effects. Further controls include age and its quadratic term, indicators for education, and household size.

\* Significant at 10%; \*\* significant at 5%; \*\*\* significant at 1%.

Table A.35: Effects of Trade Exposure on Labor Force Participation - Falsification Test - 2SLS Estimates

|                                     | (1)<br>Pooled     | (2)<br>Low-educated | (3)<br>High-educated | (4)<br>Males      | (5)<br>Females    |
|-------------------------------------|-------------------|---------------------|----------------------|-------------------|-------------------|
| Import exposure<br>(Eastern Europe) | -0.110<br>(0.147) | -0.032<br>(0.168)   | -0.308<br>(0.240)    | -0.024<br>(0.144) | -0.120<br>(0.222) |
| Export exposure<br>(Eastern Europe) | 0.009<br>(0.101)  | -0.057<br>(0.115)   | 0.247<br>(0.183)     | -0.085<br>(0.105) | 0.037<br>(0.121)  |
| Observations                        | 32,194            | 24,113              | 7,973                | 15,355            | 16,813            |
| Mean of dep. var.                   | 0.759             | 0.766               | 0.740                | 0.838             | 0.688             |
| Std. dev. of dep. var.              | 0.427             | 0.423               | 0.439                | 0.369             | 0.463             |
| First stage F-statistic Import      | 63.7              | 59.3                | 39.4                 | 135.7             | 29.2              |
| First stage F-statistic Export      | 56.4              | 52.2                | 44.2                 | 99.2              | 45.7              |

*Notes* - Standard errors are reported in parentheses and are clustered at the industry level. All models include individual, year  $\times$  federal state, year  $\times$  occupation, and 1-digit industry fixed effects. Further controls include age and its quadratic term, indicators for education, and household size.

\* Significant at 10%; \*\* significant at 5%; \*\*\* significant at 1%.

Table A.36: Effects of Trade Exposure on Fertility - Falsification Test - 2SLS Estimates

|                                     | (1)               | (2)               | (3)               | (4)                | (5)               |
|-------------------------------------|-------------------|-------------------|-------------------|--------------------|-------------------|
|                                     | Pooled            | Low-educated      | High-educated     | Males              | Females           |
| Panel A: Overall Fertility          |                   |                   |                   |                    |                   |
| Import exposure<br>(Eastern Europe) | -0.003<br>(0.087) | -0.004<br>(0.096) | 0.143<br>(0.229)  | -0.099<br>(0.131)  | 0.099<br>(0.092)  |
| Export exposure<br>(Eastern Europe) | 0.017<br>(0.066)  | 0.021<br>(0.069)  | -0.073<br>(0.149) | 0.073<br>(0.093)   | -0.029<br>(0.057) |
| Observations                        | 25,671            | 18,765            | 6,793             | 13,372             | 12,275            |
| Mean of dep. var.                   | 0.075             | 0.075             | 0.077             | 0.076              | 0.074             |
| Std. dev. of dep. var.              | 0.264             | 0.263             | 0.267             | 0.266              | 0.262             |
| Panel B: Marital Fertility          |                   |                   |                   |                    |                   |
| Import exposure<br>(Eastern Europe) | -0.015<br>(0.100) | -0.004<br>(0.098) | 0.196<br>(0.303)  | -0.157<br>(0.169)  | 0.137<br>(0.113)  |
| Export exposure<br>(Eastern Europe) | 0.037<br>(0.078)  | 0.045<br>(0.074)  | -0.130<br>(0.212) | 0.121<br>(0.120)   | -0.021<br>(0.066) |
| Observations                        | 19,066            | 14,100            | 4,879             | 9,597              | 9,418             |
| Mean of dep. var.                   | 0.098             | 0.096             | 0.103             | 0.104              | 0.092             |
| Std. dev. of dep. var.              | 0.298             | 0.296             | 0.304             | 0.306              | 0.290             |
| Panel C: Nonmarital Fertility       |                   |                   |                   |                    |                   |
| Import exposure<br>(Eastern Europe) | -0.111<br>(0.070) | -0.117<br>(0.071) | -0.200<br>(0.169) | -0.0861<br>(0.064) | -0.275<br>(0.170) |
| Export exposure<br>(Eastern Europe) | 0.0461<br>(0.044) | 0.050<br>(0.051)  | 0.119<br>(0.093)  | 0.0400<br>(0.043)  | 0.109<br>(0.113)  |
| Observations                        | 6,358             | 4,451             | 1,749             | 3,596              | 2,669             |
| Mean of dep. var.                   | 0.010             | 0.009             | 0.011             | 0.006              | 0.014             |
| Std. dev. of dep. var.              | 0.098             | 0.093             | 0.106             | 0.074              | 0.118             |

*Notes* - Standard errors are reported in parentheses and are clustered at the industry level. All models include individual, year  $\times$  federal state, year  $\times$  occupation, and 1-digit industry fixed effects. Further controls include age and its quadratic term, indicators for education, and household size.

\* Significant at 10%; \*\* significant at 5%; \*\*\* significant at 1%.

Table A.37: Effects of Trade Exposure on Marital Behavior - Falsification Test - 2SLS Estimates

|                                     | (1)               | (2)               | (3)               | (4)               | (5)               |
|-------------------------------------|-------------------|-------------------|-------------------|-------------------|-------------------|
|                                     | Pooled            | Low-educated      | High-educated     | Males             | Females           |
| Panel A: Marriage                   |                   |                   |                   |                   |                   |
| Import exposure<br>(Eastern Europe) | 0.063<br>(0.126)  | 0.110<br>(0.151)  | 0.103<br>(0.243)  | 0.054<br>(0.179)  | 0.253<br>(0.198)  |
| Export exposure<br>(Eastern Europe) | -0.058<br>(0.083) | -0.093<br>(0.101) | -0.103<br>(0.146) | -0.041<br>(0.122) | -0.181<br>(0.115) |
| Observations                        | 22,326            | 15,809            | 6,417             | 11,652            | 10,650            |
| Mean of dep. var.                   | 0.472             | 0.489             | 0.434             | 0.405             | 0.545             |
| Std. dev. of dep. var.              | 0.499             | 0.500             | 0.496             | 0.491             | 0.498             |
| Panel B: Divorce                    |                   |                   |                   |                   |                   |
| Import exposure<br>(Eastern Europe) | 0.006<br>(0.034)  | 0.002<br>(0.045)  | 0.069<br>(0.044)  | 0.006<br>(0.025)  | -0.041<br>(0.145) |
| Export exposure<br>(Eastern Europe) | -0.005<br>(0.022) | -0.009<br>(0.030) | -0.036<br>(0.026) | -0.013<br>(0.019) | 0.051<br>(0.087)  |
| Observations                        | 25,431            | 18,551            | 6,765             | 13,576            | 11,808            |
| Mean of dep. var.                   | 0.025             | 0.028             | 0.016             | 0.019             | 0.032             |
| Std. dev. of dep. var.              | 0.157             | 0.166             | 0.125             | 0.137             | 0.176             |
| Panel C: Cohabitation               |                   |                   |                   |                   |                   |
| Import exposure<br>(Eastern Europe) | -0.088<br>(0.107) | -0.044<br>(0.117) | -0.206<br>(0.286) | 0.056<br>(0.116)  | -0.260<br>(0.232) |
| Export exposure<br>(Eastern Europe) | 0.061<br>(0.077)  | 0.060<br>(0.084)  | 0.102<br>(0.191)  | -0.045<br>(0.090) | 0.159<br>(0.161)  |
| Observations                        | 23,817            | 17,220            | 6,477             | 12,656            | 11,115            |
| Mean of dep. var.                   | 0.225             | 0.208             | 0.270             | 0.215             | 0.235             |
| Std. dev. of dep. var.              | 0.417             | 0.406             | 0.444             | 0.411             | 0.424             |

*Notes* - Standard errors are reported in parentheses and are clustered at the industry level. All models include individual, year  $\times$  federal state, year  $\times$  occupation, and 1-digit industry fixed effects. Further controls include age and its quadratic term, indicators for education, and household size.

\* Significant at 10%; \*\* significant at 5%; \*\*\* significant at 1%.
